# Supplementary material for: Quantitative evaluation of anharmonic bond potentials for molecular simulations
Source: Royal Society of Chemistry journal article supplement (doi:10.1039/d4dd00344f), 2025-01-01
Supplement: d4dd00344f1.pdf [file d4dd00344f1.pdf]

# Journal Name

## ARTICLE TYPE

Cite this: DOI: 00.0000/xxxxxxxxxx

## Quantitative Evaluation of Anharmonic Bond Potentials for Molecular Simulations - Supporting Information

Paul J. van Maaren,<sup>a</sup> and David van der Spoel<sup>\*a</sup>

---

<sup>a</sup> Department of Cell and Molecular Biology, Uppsala University, Uppsala, Sweden. E-mail: david.vanderspoel@icm.uu.se

Table S1 Name and properties (charge  $q$ , multiplicity  $m$ ) of the diatomics studied. Covalency is indicated by  $cov$ . Equilibrium distance  $r_{eq}^1$ , range of the quantum chemical scan ( $r_0$ ,  $r_1$  in Å) and number of points  $N$  in the scan.

| Compound            | Formula                     | $q$ | $m$ | $cov$ | $r_0$ | $r_{eq}$ | $r_1$ | $N$ |
|---------------------|-----------------------------|-----|-----|-------|-------|----------|-------|-----|
| dicarbon            | C <sub>2</sub>              | 0   | 1   | True  | 1.04  | 1.24253  | 1.49  | 89  |
| carbon monofluoride | CF                          | 0   | 2   | True  | 1.07  | 1.2718   | 1.525 | 92  |
| carbon monohydride  | CH                          | 0   | 2   | True  | 0.94  | 1.1199   | 1.34  | 72  |
| dilithium           | Li <sub>2</sub>             | 0   | 1   | True  | 2.25  | 2.6729   | 3.205 | 190 |
| lithium hydride     | LiH                         | 0   | 1   | True  | 1.34  | 1.59491  | 1.91  | 114 |
| cyano radical       | CN                          | 0   | 2   | True  | 0.98  | 1.17182  | 1.405 | 81  |
| nitrogen ion        | N <sub>2</sub> <sup>+</sup> | 1   | 2   | True  | 0.92  | 1.11642  | 1.315 | 71  |
| hydrogen            | H <sub>2</sub>              | 0   | 1   | True  | 0.62  | 0.74144  | 0.885 | 55  |
| hydrogen fluoride   | HF                          | 0   | 1   | True  | 0.77  | 0.916808 | 1.1   | 60  |
| hydrogen chloride   | HCl                         | 0   | 1   | True  | 1.07  | 1.27455  | 1.525 | 92  |
| hydrogen bromide    | HBr                         | 0   | 1   | True  | 1.19  | 1.41444  | 1.695 | 103 |
| hydrogen iodide     | HI                          | 0   | 1   | True  | 1.35  | 1.60916  | 1.93  | 116 |
| fluorine            | F <sub>2</sub>              | 0   | 1   | True  | 1.19  | 1.41193  | 1.69  | 102 |
| chlorine            | Cl <sub>2</sub>             | 0   | 1   | True  | 1.67  | 1.9879   | 2.375 | 122 |
| bromine             | Br <sub>2</sub>             | 0   | 1   | True  | 1.92  | 2.28105  | 2.735 | 147 |
| chlorine fluoride   | ClF                         | 0   | 1   | True  | 1.37  | 1.62831  | 1.95  | 116 |
| bromine fluoride    | BrF                         | 0   | 1   | True  | 1.48  | 1.75894  | 2.105 | 119 |
| iodine fluoride     | IF                          | 0   | 1   | True  | 1.6   | 1.9098   | 2.29  | 123 |
| bromine chloride    | BrCl                        | 0   | 1   | True  | 1.79  | 2.13606  | 2.56  | 131 |
| iodine chloride     | ICl                         | 0   | 1   | True  | 1.95  | 2.32088  | 2.785 | 153 |
| iodine bromide      | IBr                         | 0   | 1   | True  | 2.07  | 2.46899  | 2.96  | 172 |
| iodine              | I <sub>2</sub>              | 0   | 1   | True  | 2.24  | 2.6663   | 3.195 | 190 |
| oxygen              | O <sub>2</sub>              | 0   | 3   | True  | 1.01  | 1.20752  | 1.445 | 86  |
| nitrogen            | N <sub>2</sub>              | 0   | 1   | True  | 0.92  | 1.09769  | 1.315 | 71  |
| carbon monoxide     | CO                          | 0   | 1   | True  | 0.95  | 1.12832  | 1.35  | 72  |
| carbon monosulfide  | CS                          | 0   | 1   | True  | 1.29  | 1.53494  | 1.84  | 111 |
| sulfur monoxide     | SO                          | 0   | 3   | True  | 1.24  | 1.48109  | 1.775 | 108 |
| phosphor nitride    | PN                          | 0   | 1   | True  | 1.25  | 1.49087  | 1.785 | 108 |
| hydroxide           | OH <sup>-</sup>             | -1  | 1   | True  | 0.81  | 0.97     | 1.155 | 61  |
| hydroxide           | OH                          | 0   | 2   | True  | 0.81  | 0.96966  | 1.155 | 61  |
| nitric oxide        | NO                          | 0   | 2   | True  | 0.97  | 1.15077  | 1.38  | 76  |
| lithium fluoride    | LiF                         | 0   | 1   | False | 1.31  | 1.56386  | 1.875 | 114 |
| lithium chloride    | LiCl                        | 0   | 1   | False | 1.7   | 2.02067  | 2.42  | 123 |
| lithium bromide     | LiBr                        | 0   | 1   | False | 1.82  | 2.17043  | 2.6   | 134 |
| lithium iodide      | LiI                         | 0   | 1   | False | 2.01  | 2.39192  | 2.87  | 162 |
| sodium fluoride     | NaF                         | 0   | 1   | False | 1.62  | 1.92595  | 2.31  | 122 |
| sodium chloride     | NaCl                        | 0   | 1   | False | 1.98  | 2.36079  | 3.03  | 198 |
| sodium bromide      | NaBr                        | 0   | 1   | False | 2.1   | 2.50204  | 3     | 176 |
| sodium iodide       | NaI                         | 0   | 1   | False | 2.28  | 2.71145  | 3.25  | 194 |
| potassium fluoride  | KF                          | 0   | 1   | False | 1.82  | 2.17146  | 2.605 | 137 |
| potassium chloride  | KCl                         | 0   | 1   | False | 2.24  | 2.66665  | 3.195 | 190 |
| potassium bromide   | KBr                         | 0   | 1   | False | 2.37  | 2.821    | 3.38  | 202 |
| potassium iodide    | KI                          | 0   | 1   | False | 2.56  | 3.04784  | 3.655 | 219 |
| rubidium fluoride   | RbF                         | 0   | 1   | False | 1.91  | 2.27033  | 2.72  | 149 |
| rubidium chloride   | RbCl                        | 0   | 1   | False | 2.34  | 2.78674  | 3.34  | 200 |
| rubidium bromide    | RbBr                        | 0   | 1   | False | 2.47  | 2.945    | 3.53  | 212 |
| rubidium iodide     | RbI                         | 0   | 1   | False | 2.67  | 3.17688  | 3.81  | 227 |
| cesium fluoride     | CsF                         | 0   | 1   | False | 1.97  | 2.34535  | 2.81  | 156 |
| cesium chloride     | CsCl                        | 0   | 1   | False | 2.44  | 2.90627  | 3.485 | 210 |
| cesium bromide      | CsBr                        | 0   | 1   | False | 2.58  | 3.07225  | 3.685 | 221 |

| Compound                | Formula         | q | m | cov   | $r_0$ | $r_{eq}$ | $r_1$ | N   |
|-------------------------|-----------------|---|---|-------|-------|----------|-------|-----|
| cesium iodide           | CsI             | 0 | 1 | False | 2.78  | 3.31519  | 3.975 | 237 |
| beryllium oxide         | BeO             | 0 | 1 | False | 1.12  | 1.3309   | 1.595 | 88  |
| beryllium sulfide       | BeS             | 0 | 1 | False | 1.46  | 1.74153  | 2.085 | 120 |
| magnesium oxide         | MgO             | 0 | 1 | False | 1.47  | 1.749    | 2.095 | 126 |
| magnesium sulfide       | MgS             | 0 | 1 | False | 1.8   | 2.1425   | 2.57  | 131 |
| calcium oxide           | CaO             | 0 | 1 | False | 1.53  | 1.8221   | 2.145 | 108 |
| calcium sulfide         | CaS             | 0 | 1 | False | 1.95  | 2.3178   | 2.78  | 154 |
| boron monofluoride      | BF              | 0 | 1 | True  | 1.06  | 1.26259  | 1.52  | 92  |
| boron monochloride      | BCl             | 0 | 1 | True  | 1.44  | 1.7159   | 2.06  | 120 |
| bromine monoxide        | BrO             | 0 | 2 | True  | 1.44  | 1.717    | 2.06  | 120 |
| chlorine monoxide       | ClO             | 0 | 2 | True  | 1.34  | 1.56963  | 1.915 | 115 |
| iodine monoxide         | IO              | 0 | 2 | True  | 1.57  | 1.8676   | 2.24  | 122 |
| lithium monoxide        | LiO             | 0 | 2 | True  | 1.42  | 1.695    | 2.025 | 119 |
| nitric oxide ion        | NO <sup>+</sup> | 1 | 1 | True  | 0.9   | 1.06322  | 1.27  | 66  |
| nitric sulfide          | NS              | 0 | 2 | True  | 1.26  | 1.49402  | 1.795 | 108 |
| sodium hydride          | NaH             | 0 | 1 | True  | 1.58  | 1.889    | 2.25  | 121 |
| phosphorus monofluoride | PF              | 0 | 3 | True  | 1.34  | 1.5897   | 1.91  | 114 |
| phosphorus monoxide     | PO              | 0 | 2 | True  | 1.24  | 1.4759   | 1.77  | 107 |
| sulfur monofluoride     | SF              | 0 | 2 | True  | 1.34  | 1.59624  | 1.915 | 115 |
| sulfur hydride          | SH              | 0 | 2 | True  | 1.13  | 1.3409   | 1.605 | 97  |
| disulfur                | S <sub>2</sub>  | 0 | 3 | True  | 1.63  | 1.8892   | 2.325 | 122 |

Table S2 Statistics per function for quantum chemistry results.  $M_f$  is the number of parameters used for fitting,  $M_{sim}$  the number of parameters if the minimum is not fixed at zero and when redundancies are removed (see text).  $N$  is the number of compounds,  $Z$  is the average Z-score ( $\text{cm}^{-2}/\text{\AA}$ ), and RMSD (J/mol) is the root mean signed error from quantum chemical results. No energy cut-off was applied. Table is sorted after Z-score for covalent compounds computed at the CCSD(T) level of theory.

| Function                          | $M_f$ | $M_{sim}$ | CCSD(T)           |      |               |       | MP2               |      |               |       |
|-----------------------------------|-------|-----------|-------------------|------|---------------|-------|-------------------|------|---------------|-------|
|                                   |       |           | Non-covalent (26) |      | Covalent (45) |       | Non-covalent (26) |      | Covalent (45) |       |
|                                   |       |           | Z                 | RMSD | Z             | RMSD  | Z                 | RMSD | Z             | RMSD  |
| Sun <sup>2</sup>                  | 8     | 8         | 1.1               | 10   | 0.0           | 1.6   | 4.0               | 19   | 362           | 181   |
| Hulburt-Hirschfelder <sup>3</sup> | 5     | 5         | 6.1               | 24   | 0.5           | 6.7   | 21                | 44   | 475           | 201   |
| Rafi <sup>4</sup>                 | 5     | 4         | 29                | 55   | 4.5           | 20    | 123               | 106  | 2480          | 448   |
| Tietz II <sup>5</sup>             | 5     | 4         | 23                | 51   | 6.2           | 23    | 130               | 110  | 4640          | 605   |
| Wei Hua <sup>6</sup>              | 4     | 4         | 25                | 54   | 6.7           | 24    | 140               | 114  | 6240          | 701   |
| Levine <sup>7</sup>               | 4     | 4         | 36                | 64   | 12            | 33    | 458               | 205  | 6645          | 724   |
| Frost-Musulin <sup>8</sup>        | 4     | 3         | 142               | 125  | 140           | 102   | 599               | 239  | 6488          | 713   |
| Pöschl-Teller <sup>9</sup>        | 4     | 3         | 146               | 128  | 171           | 114   | 603               | 240  | 6553          | 717   |
| Cahill <sup>10</sup>              | 6     | 6         | 19                | 43   | 199           | 125   | 25                | 43   | 4005          | 564   |
| Linnett <sup>11</sup>             | 4     | 3         | 165               | 134  | 238           | 129   | 493               | 220  | 6174          | 695   |
| Murrell-Sorbie <sup>12</sup>      | 5     | 5         | 148               | 115  | 291           | 146   | 376               | 180  | 7990          | 786   |
| Morse <sup>13</sup>               | 3     | 3         | 199               | 150  | 323           | 154   | 771               | 272  | 9443          | 859   |
| Deng-Fan <sup>14</sup>            | 3     | 3         | 191               | 141  | 360           | 149   | 905               | 292  | 9070          | 836   |
| Valence-State <sup>15</sup>       | 4     | 4         | 245               | 157  | 553           | 205   | 719               | 261  | 7290          | 748   |
| Rosen-Morse <sup>16</sup>         | 4     | 3         | 205               | 152  | 563           | 201   | 621               | 246  | 7231          | 754   |
| Rydberg <sup>17</sup>             | 3     | 3         | 247               | 169  | 634           | 217   | 808               | 282  | 9644          | 870   |
| Varshni <sup>18</sup>             | 3     | 3         | 314               | 194  | 1020          | 282   | 935               | 305  | 9388          | 861   |
| Pseudo-Gaussian <sup>19</sup>     | 3     | 3         | 418               | 224  | 1613          | 353   | 977               | 317  | 10071         | 893   |
| Tang2003a <sup>20</sup>           | 6     | 6         | 1516              | 469  | 5937          | 562   | 1547              | 384  | 75357         | 2255  |
| Buckingham <sup>21</sup>          | 3     | 3         | 1458              | 382  | 8931          | 752   | 3999              | 615  | 19362         | 1172  |
| Tietz I <sup>5</sup>              | 5     | 4         | 283               | 174  | 11019         | 1019  | 1069              | 320  | 17928         | 1107  |
| Wang-Buckingham <sup>22</sup>     | 3     | 3         | 2454              | 505  | 15804         | 1031  | 3731              | 611  | 24275         | 1351  |
| Noorizadeh <sup>23</sup>          | 5     | 4         | 1413              | 343  | 128209        | 2951  | 2430              | 458  | 136069        | 3062  |
| Kratzer <sup>24</sup>             | 2     | 2         | 48819             | 2366 | 217453        | 4168  | 41893             | 2224 | 243383        | 4267  |
| Lippincott <sup>25</sup>          | 3     | 3         | 186617            | 4551 | 905299        | 8215  | 171882            | 4396 | 937451        | 8230  |
| Xie2005a <sup>26</sup>            | 4     | 3         | 200963            | 4634 | 1235501       | 9549  | 193001            | 4561 | 1211337       | 9372  |
| Harmonic                          | 3     | 2         | 421985            | 6801 | 2102933       | 12378 | 409422            | 6710 | 2137866       | 12347 |
| Lennard-Jones <sup>27</sup>       | 2     | 2         | 595164            | 7933 | 3556003       | 15521 | 768761            | 8865 | 3435437       | 15369 |

Table S3 Statistics per function for quantum chemistry results.  $M_f$  is the number of parameters used for fitting,  $M_{sim}$  the number of parameters if the minimum is not fixed at zero and when redundancies are removed (see text).  $N$  is the number of compounds,  $Z$  is the average Z-score ( $\text{cm}^{-2}/\text{\AA}$ ), and RMSD (J/mol) is the root mean signed error from quantum chemical results. An energy cut-off of  $5000 \text{ cm}^{-1}$  was applied. Table is sorted after Z-score for covalent compounds computed at the CCSD(T) level of theory.

| Function                          | $M_f$ | $M_{sim}$ | CCSD(T)           |      |               |      | MP2               |      |               |      |
|-----------------------------------|-------|-----------|-------------------|------|---------------|------|-------------------|------|---------------|------|
|                                   |       |           | Non-covalent (26) |      | Covalent (45) |      | Non-covalent (26) |      | Covalent (45) |      |
|                                   |       |           | Z                 | RMSD | Z             | RMSD | Z                 | RMSD | Z             | RMSD |
| Sun <sup>2</sup>                  | 8     | 8         | 0.2               | 4.3  | 0.0           | 0.3  | 0.2               | 3.8  | 31            | 52   |
| Hulburt-Hirschfelder <sup>3</sup> | 5     | 5         | 2.9               | 15   | 0.0           | 1.2  | 7.9               | 25   | 106           | 94   |
| Tietz II <sup>5</sup>             | 5     | 4         | 14                | 37   | 0.6           | 6.4  | 29                | 50   | 256           | 133  |
| Wei Hua <sup>6</sup>              | 4     | 4         | 24                | 46   | 0.6           | 6.7  | 31                | 51   | 304           | 143  |
| Cahill <sup>10</sup>              | 6     | 6         | 4.2               | 21   | 3.1           | 15   | 26                | 43   | 389           | 174  |
| Levine <sup>7</sup>               | 4     | 4         | 22                | 47   | 4.6           | 21   | 130               | 90   | 586           | 211  |
| Frost-Musulin <sup>8</sup>        | 4     | 3         | 50                | 74   | 16            | 32   | 198               | 129  | 549           | 197  |
| Pöschl-Teller <sup>9</sup>        | 4     | 3         | 56                | 79   | 19            | 34   | 207               | 132  | 555           | 198  |
| Morse <sup>13</sup>               | 3     | 3         | 88                | 99   | 35            | 45   | 288               | 158  | 686           | 214  |
| Linnett <sup>11</sup>             | 4     | 3         | 55                | 78   | 37            | 45   | 218               | 136  | 497           | 183  |
| Murrell-Sorbie <sup>12</sup>      | 5     | 5         | 24                | 49   | 38            | 46   | 44                | 59   | 305           | 136  |
| Rosen-Morse <sup>16</sup>         | 4     | 3         | 89                | 99   | 48            | 52   | 234               | 144  | 571           | 198  |
| Rydberg <sup>17</sup>             | 3     | 3         | 120               | 117  | 51            | 54   | 303               | 166  | 696           | 216  |
| Valence-State <sup>15</sup>       | 4     | 4         | 42                | 63   | 52            | 61   | 244               | 139  | 589           | 202  |
| Varshni <sup>18</sup>             | 3     | 3         | 162               | 135  | 80            | 67   | 342               | 177  | 751           | 226  |
| Deng-Fan <sup>14</sup>            | 3     | 3         | 50                | 74   | 90            | 66   | 337               | 159  | 823           | 235  |
| Tietz I <sup>5</sup>              | 5     | 4         | 76                | 88   | 93            | 80   | 375               | 174  | 526           | 174  |
| Pseudo-Gaussian <sup>19</sup>     | 3     | 3         | 210               | 154  | 94            | 75   | 353               | 186  | 732           | 223  |
| Wang-Buckingham <sup>22</sup>     | 3     | 3         | 982               | 322  | 1258          | 261  | 1153              | 342  | 1953          | 333  |
| Buckingham <sup>21</sup>          | 3     | 3         | 410               | 199  | 1337          | 269  | 714               | 246  | 3029          | 436  |
| Tang2003a <sup>20</sup>           | 6     | 6         | 127               | 108  | 2118          | 295  | 463               | 194  | 5482          | 486  |
| Rafi <sup>4</sup>                 | 5     | 4         | 14                | 36   | 3607          | 485  | 23                | 44   | 345           | 167  |
| Noorizadeh <sup>23</sup>          | 5     | 4         | 813               | 251  | 15198         | 871  | 889               | 261  | 12490         | 791  |
| Kratzer <sup>24</sup>             | 2     | 2         | 17225             | 1334 | 23327         | 1215 | 16488             | 1324 | 22094         | 1102 |
| Lippincott <sup>25</sup>          | 3     | 3         | 55032             | 2390 | 69416         | 1990 | 53632             | 2386 | 68641         | 1924 |
| Xie2005a <sup>26</sup>            | 4     | 3         | 58569             | 2411 | 98534         | 2374 | 55927             | 2382 | 95475         | 2261 |
| Harmonic                          | 3     | 2         | 127283            | 3592 | 193948        | 3336 | 122264            | 3554 | 186122        | 3176 |
| Lennard-Jones <sup>27</sup>       | 2     | 2         | 178020            | 4179 | 360340        | 4364 | 195436            | 4296 | 380264        | 4534 |

Table S4 Vibrational harmonic frequency  $\omega_e$  (1/cm), First anharmonic correction  $\omega_e x_e$  (1/cm), Equilibrium rotational constant  $B_e$  (1/cm), First correction of the rotational constant  $\alpha_e$  (1/cm), Centrifugal distortion constant  $D_e$  (1/cm), from experiment<sup>1</sup> and quantum chemistry (this work).

| Compound        | Experiment |                |       |            |          | CCSD(T)    |                |       |            |          | MP2        |                |       |            |          |
|-----------------|------------|----------------|-------|------------|----------|------------|----------------|-------|------------|----------|------------|----------------|-------|------------|----------|
|                 | $\omega_e$ | $\omega_e x_e$ | $B_e$ | $\alpha_e$ | $D_e$    | $\omega_e$ | $\omega_e x_e$ | $B_e$ | $\alpha_e$ | $D_e$    | $\omega_e$ | $\omega_e x_e$ | $B_e$ | $\alpha_e$ | $D_e$    |
| BeO             | 1487.3     | 11.83          | 1.65  | 1.90e-02   | 8.20e-06 | 1489.3     | 13.59          | 1.64  | 1.97e-02   | 7.98e-06 | 1428.7     | 14.00          | 1.62  | 2.09e-02   | 8.27e-06 |
| BeS             | 997.9      | 6.14           | 0.79  | 6.64e-03   | 2.00e-06 | 1001.5     | 6.17           | 0.78  | 6.38e-03   | 1.92e-06 | 1011.0     | 4.82           | 0.78  | 5.86e-03   | 1.89e-06 |
| BCl             | 839.1      | 5.11           | 0.68  | 6.46e-03   | 1.72e-06 | 857.3      | 7.11           | 0.68  | 7.03e-03   | 1.74e-06 | 877.1      | 7.19           | 0.69  | 7.04e-03   | 1.73e-06 |
| BF              | 1402.1     | 11.84          | 1.51  | 1.98e-02   | 7.60e-06 | 1408.0     | 13.92          | 1.51  | 1.93e-02   | 6.91e-06 | 1419.3     | 13.95          | 1.51  | 1.93e-02   | 6.89e-06 |
| Br <sub>2</sub> | 325.3      | 1.08           | 0.08  | 3.19e-04   | 2.09e-08 | 328.0      | 1.18           | 0.08  | 3.11e-04   | 1.99e-08 | 347.5      | 1.02           | 0.08  | 2.84e-04   | 1.89e-08 |
| BrCl            | 444.3      | 1.84           | 0.15  | 7.70e-04   | 7.18e-08 | 442.0      | 2.08           | 0.15  | 7.66e-04   | 6.92e-08 | 466.9      | 1.79           | 0.15  | 7.02e-04   | 6.59e-08 |
| BrF             | 670.8      | 4.05           | 0.36  | 2.61e-03   | 4.01e-07 | 683.7      | 4.55           | 0.36  | 2.67e-03   | 3.88e-07 | 701.9      | 4.04           | 0.36  | 2.50e-03   | 3.76e-07 |
| BrO             | 778.7      | 6.80           | 0.43  | 3.64e-03   | 5.23e-07 | 738.3      | 5.83           | 0.43  | 3.80e-03   | 5.81e-07 | 685.2      | 3.13           | 0.44  | 2.99e-03   | 7.13e-07 |
| CaO             | 732.1      | 4.81           | 0.44  | 3.38e-03   | 6.58e-07 | 593.0      | 8.11           | 0.41  | 5.42e-03   | 8.08e-07 | 675.3      | 7.69           | 0.43  | 3.97e-03   | 6.78e-07 |
| CaS             | 462.2      | 1.78           | 0.18  | 8.37e-04   | 1.02e-07 | 433.9      | 1.99           | 0.17  | 8.71e-04   | 1.01e-07 | 443.3      | 2.00           | 0.17  | 8.66e-04   | 1.01e-07 |
| CF              | 1308.1     | 11.10          | 1.42  | 1.84e-02   | 6.50e-06 | 1321.9     | 13.86          | 1.42  | 1.91e-02   | 6.49e-06 | 1342.5     | 13.79          | 1.43  | 1.90e-02   | 6.43e-06 |
| CH              | 2858.5     | 63.02          | 14.46 | 5.34e-01   | 1.45e-03 | 2920.8     | 83.63          | 14.73 | 6.05e-01   | 1.50e-03 | 3017.2     | 76.70          | 14.92 | 5.57e-01   | 1.46e-03 |
| CS              | 1285.1     | 6.46           | 0.82  | 5.92e-03   | 1.43e-06 | 1281.6     | 7.20           | 0.81  | 6.01e-03   | 1.30e-06 | 1308.9     | 6.35           | 0.82  | 5.69e-03   | 1.28e-06 |
| CO              | 2169.8     | 13.29          | 1.93  | 1.75e-02   | 6.12e-06 | 2173.9     | 14.35          | 1.92  | 1.77e-02   | 6.01e-06 | 2137.6     | 14.62          | 1.91  | 1.81e-02   | 6.11e-06 |
| CsBr            | 149.7      | 0.37           | 0.04  | 1.24e-04   | 8.38e-07 | 145.6      | 0.49           | 0.03  | 1.33e-04   | 8.03e-09 | 147.9      | 0.50           | 0.04  | 1.34e-04   | 8.05e-09 |
| CsCl            | 214.2      | 0.73           | 0.07  | 3.38e-04   | 3.27e-08 | 210.7      | 0.96           | 0.07  | 3.62e-04   | 3.10e-08 | 213.2      | 0.98           | 0.07  | 3.64e-04   | 3.12e-08 |
| CsF             | 352.6      | 1.61           | 0.18  | 1.18e-03   | 2.02e-07 | 356.2      | 2.16           | 0.18  | 1.25e-03   | 1.81e-07 | 354.3      | 2.17           | 0.18  | 1.27e-03   | 1.83e-07 |
| CsI             | 119.2      | 0.25           | 0.02  | 6.83e-05   | 3.71e-07 | 115.6      | 0.33           | 0.02  | 7.36e-05   | 3.58e-09 | 117.7      | 0.34           | 0.02  | 7.41e-05   | 3.58e-09 |
| Cl <sub>2</sub> | 559.7      | 2.67           | 0.24  | 1.49e-03   | 1.86e-07 | 550.0      | 3.15           | 0.24  | 1.50e-03   | 1.79e-07 | 580.5      | 2.73           | 0.24  | 1.38e-03   | 1.70e-07 |
| ClF             | 786.1      | 6.16           | 0.52  | 4.36e-03   | 8.77e-07 | 782.1      | 5.87           | 0.51  | 4.37e-03   | 8.57e-07 | 807.8      | 5.09           | 0.51  | 4.01e-03   | 8.25e-07 |
| ClO             | 853.8      | 5.50           | 0.62  | 5.80e-03   | 1.33e-06 | 845.0      | 7.02           | 0.61  | 5.99e-03   | 1.26e-06 | 801.1      | 4.36           | 0.63  | 5.86e-03   | 1.54e-06 |
| CN              | 2068.6     | 13.09          | 1.90  | 1.74e-02   | 6.40e-06 | 2082.8     | 14.20          | 1.89  | 1.75e-02   | 6.27e-06 | 1849.5     | 27.64          | 1.85  | 2.74e-02   | 7.45e-06 |
| C <sub>2</sub>  | 1854.7     | 13.34          | 1.82  | 1.76e-02   | 6.92e-06 | 1878.7     | 13.87          | 1.81  | 1.75e-02   | 6.77e-06 | 1908.6     | 13.10          | 1.79  | 1.59e-02   | 6.27e-06 |
| Li <sub>2</sub> | 351.4      | 2.61           | 0.67  | 7.04e-03   | 9.87e-06 | 347.4      | 2.53           | 0.68  | 7.11e-03   | 1.03e-05 | 342.7      | 2.04           | 0.65  | 6.25e-03   | 9.39e-06 |
| S <sub>2</sub>  | 725.6      | 2.84           | 0.30  | 1.57e-03   | 1.90e-07 | 720.9      | 3.15           | 0.29  | 1.57e-03   | 1.86e-07 | 698.7      | 3.80           | 0.29  | 1.75e-03   | 1.95e-07 |
| F <sub>2</sub>  | 916.6      | 11.24          | 0.89  | 1.38e-02   | 3.30e-05 | 927.1      | 13.63          | 0.89  | 1.29e-02   | 3.26e-06 | 1011.2     | 10.09          | 0.91  | 1.04e-02   | 2.93e-06 |
| H <sub>2</sub>  | 4401.2     | 121.34         |       | 3.06e+00   | 4.71e-02 | 4403.2     | 146.94         | 60.61 | 3.36e+00   | 4.59e-02 | 4521.1     | 139.28         | 61.52 | 3.12e+00   | 4.56e-02 |
| HBr             | 2649.0     | 45.22          | 8.46  | 2.33e-01   | 3.46e-04 | 2728.8     | 60.02          | 8.57  | 2.55e-01   | 3.38e-04 | 2796.5     | 56.19          | 8.66  | 2.44e-01   | 3.32e-04 |
| HCl             | 2990.9     | 52.82          | 10.59 | 3.07e-01   | 5.32e-04 | 3010.0     | 64.10          | 10.59 | 3.20e-01   | 5.24e-04 | 3062.2     | 60.44          | 10.65 | 3.07e-01   | 5.16e-04 |
| HF              | 4138.3     | 89.88          | 20.96 | 7.98e-01   | 2.15e-03 | 4145.0     | 109.17         | 20.85 | 8.20e-01   | 2.11e-03 | 4142.2     | 106.40         | 20.81 | 8.08e-01   | 2.10e-03 |
| HI              | 2309.0     | 39.64          | 6.43  | 1.69e-01   | 2.07e-04 | 2356.3     | 47.81          | 6.54  | 1.74e-01   | 2.01e-04 | 2429.3     | 43.05          | 6.62  | 1.62e-01   | 1.96e-04 |
| OH              | 3737.8     | 84.88          | 18.91 | 7.24e-01   | 1.94e-03 | 3751.3     | 102.11         | 18.90 | 7.58e-01   | 1.92e-03 | 3822.6     | 96.03          | 19.04 | 7.24e-01   | 1.89e-03 |
| OH <sup>-</sup> | 3700.0     |                |       |            |          | 3760.8     | 113.41         | 19.12 | 8.15e-01   | 1.98e-03 | 3825.8     | 91.63          | 19.13 | 7.24e-01   | 1.91e-03 |
| I <sub>2</sub>  | 214.5      | 0.61           | 0.04  | 1.14e-04   | 4.25e-09 | 217.5      | 0.61           | 0.04  | 1.04e-04   | 4.18e-09 | 231.2      | 0.53           | 0.04  | 9.53e-05   | 3.94e-09 |
| IBr             | 268.6      | 0.81           | 0.06  | 1.97e-04   | 1.02e-07 | 273.2      | 0.89           | 0.06  | 1.88e-04   | 9.46e-09 | 289.3      | 0.78           | 0.06  | 1.73e-04   | 8.97e-09 |
| ICl             | 384.3      | 1.50           | 0.11  | 5.35e-04   | 4.03e-08 | 386.7      | 1.71           | 0.11  | 5.24e-04   | 3.79e-08 | 407.3      | 1.51           | 0.11  | 4.86e-04   | 3.61e-08 |
| IF              | 610.2      | 3.12           | 0.28  | 1.87e-03   | 2.37e-07 | 629.1      | 3.73           | 0.28  | 1.85e-03   | 2.15e-07 | 640.3      | 3.40           | 0.28  | 1.75e-03   | 2.10e-07 |
| IO              | 681.5      | 4.29           | 0.34  | 2.70e-03   | 3.60e-07 | 678.2      | 5.36           | 0.33  | 2.75e-03   | 3.21e-07 | 611.1      | 2.76           | 0.33  | 1.53e-03   | 3.87e-07 |

| Compound                    | $\omega_i$ | $\omega_e X_e$ | $B_e$ | $\alpha_e$ | $D_e$    | $\omega_e$ | $\omega_e X_e$ | $B_e$ | $\alpha_e$ | $D_e$    | $\omega_e$ | $\omega_e X_e$ | $B_e$ | $\alpha_e$ | $D_e$    |
|-----------------------------|------------|----------------|-------|------------|----------|------------|----------------|-------|------------|----------|------------|----------------|-------|------------|----------|
| LiBr                        | 563.2      | 3.53           | 0.56  | 5.64e-03   | 2.16e-06 | 574.2      | 4.59           | 0.55  | 5.96e-03   | 2.07e-06 | 575.6      | 4.61           | 0.56  | 5.97e-03   | 2.07e-06 |
| LiCl                        | 643.3      | 4.50           | 0.71  | 8.01e-03   | 3.41e-06 | 643.5      | 5.56           | 0.70  | 8.40e-03   | 3.33e-06 | 643.1      | 5.57           | 0.70  | 8.42e-03   | 3.32e-06 |
| LiF                         | 910.3      | 7.93           | 1.35  | 2.03e-02   | 1.18e-05 | 903.1      | 9.98           | 1.32  | 2.06e-02   | 1.13e-05 | 892.4      | 9.83           | 1.31  | 2.06e-02   | 1.13e-05 |
| LiH                         | 1405.5     | 23.18          | 7.51  | 2.16e-01   | 8.62e-04 | 1403.9     | 26.11          | 7.52  | 2.25e-01   | 8.65e-04 | 1431.2     | 24.53          | 7.57  | 2.11e-01   | 8.46e-04 |
| LiI                         | 498.2      | 3.39           | 0.44  | 4.09e-03   | 1.45e-06 | 500.8      | 3.55           | 0.44  | 4.22e-03   | 1.35e-06 | 501.6      | 3.55           | 0.44  | 4.21e-03   | 1.35e-06 |
| LiO                         | 851.5      | 12.50          | 1.20  | 1.51e-02   | 1.22e-06 | 861.9      | 10.62          | 1.36  | 2.12e-02   | 1.35e-05 | 818.5      | 10.32          | 1.20  | 1.31e-02   | 1.03e-05 |
| MgO                         | 785.1      | 5.18           | 0.57  | 5.00e-03   | 1.22e-06 | 792.8      | 8.79           | 0.58  | 6.46e-03   | 1.21e-06 | 999.6      | 2.56           | 0.58  | 1.02e-03   | 7.89e-07 |
| MgS                         | 528.7      | 2.70           | 0.27  | 1.76e-03   | 2.76e-07 | 536.9      | 3.05           | 0.26  | 1.70e-03   | 2.57e-07 | 568.0      | 1.94           | 0.27  | 1.30e-03   | 2.36e-07 |
| NO                          | 1904.2     | 14.07          | 1.67  | 1.71e-02   | 5.40e-06 | 1916.3     | 15.10          | 1.70  | 1.76e-02   | 5.37e-06 | 1922.7     | 11.61          | 1.69  | 1.54e-02   | 5.25e-06 |
| NO <sup>+</sup>             | 2376.4     | 16.26          | 2.00  | 1.89e-02   | 5.64e-06 | 2387.3     | 17.38          | 1.99  | 1.89e-02   | 5.54e-06 | 2191.3     | 23.00          | 1.94  | 2.34e-02   | 6.12e-06 |
| NS                          | 1218.7     | 7.28           | 0.77  | 6.35e-03   | 1.20e-06 | 1213.7     | 8.27           | 0.76  | 6.30e-03   | 1.20e-06 | 1455.1     | 17.66          | 0.79  | 6.01e-03   | 9.29e-07 |
| N <sub>2</sub>              | 2358.6     | 14.32          | 2.00  | 1.73e-02   | 5.76e-06 | 2370.3     | 15.13          | 1.99  | 1.74e-02   | 5.61e-06 | 2221.1     | 20.38          | 1.95  | 2.10e-02   | 6.06e-06 |
| N <sub>2</sub> <sup>+</sup> | 2207.0     | 16.10          | 1.93  | 1.88e-02   | 6.10e-06 | 2221.3     | 17.18          | 1.93  | 1.90e-02   | 5.79e-06 | 2055.8     | 20.22          | 1.87  | 2.13e-02   | 6.17e-06 |
| O <sub>2</sub>              | 1580.2     | 11.98          | 1.44  | 1.59e-02   | 4.84e-06 | 1596.0     | 12.94          | 1.44  | 1.58e-02   | 4.73e-06 | 1282.3     | 24.22          | 1.36  | 2.46e-02   | 6.06e-06 |
| PN                          | 1337.2     | 6.98           | 0.79  | 5.54e-03   | 1.09e-06 | 1329.7     | 7.43           | 0.77  | 5.52e-03   | 1.05e-06 | 1194.2     | 11.27          | 0.75  | 7.32e-03   | 1.20e-06 |
| PF                          | 846.8      | 4.49           | 0.57  | 4.56e-03   | 1.30e-06 | 842.3      | 5.52           | 0.56  | 4.71e-03   | 9.68e-07 | 846.0      | 5.35           | 0.56  | 4.64e-03   | 9.60e-07 |
| PO                          | 1233.3     | 6.56           | 0.73  | 5.50e-03   | 1.30e-06 | 1220.8     | 7.31           | 0.72  | 5.49e-03   | 9.96e-07 | 1194.3     | 6.86           | 0.71  | 5.45e-03   | 1.01e-06 |
| KBr                         | 213.0      | 0.80           | 0.08  | 4.00e-04   | 1.09e-07 | 215.1      | 0.92           | 0.08  | 4.10e-04   | 4.12e-08 | 216.9      | 0.94           | 0.08  | 4.13e-04   | 4.14e-08 |
| KCl                         | 281.0      | 1.30           | 0.13  | 7.90e-04   | 4.83e-07 | 272.9      | 1.41           | 0.12  | 7.92e-04   | 1.01e-07 | 274.5      | 1.44           | 0.12  | 7.97e-04   | 1.02e-07 |
| KF                          | 428.0      | 2.40           | 0.28  | 2.34e-03   | 2.89e-07 | 411.6      | 2.80           | 0.27  | 2.35e-03   | 4.57e-07 | 408.0      | 2.76           | 0.27  | 2.36e-03   | 4.62e-07 |
| KI                          | 186.5      | 0.57           | 0.06  | 2.68e-04   | 2.89e-07 | 183.7      | 0.72           | 0.06  | 2.76e-04   | 2.40e-08 | 185.6      | 0.73           | 0.06  | 2.78e-04   | 2.41e-08 |
| RbBr                        | 169.5      | 0.46           | 0.05  | 1.86e-04   | 4.95e-08 | 167.9      | 0.60           | 0.05  | 1.90e-04   | 1.32e-08 | 168.7      | 0.60           | 0.05  | 1.91e-04   | 1.33e-08 |
| RbCl                        | 228.0      | 0.92           | 0.09  | 4.54e-04   | 2.68e-07 | 232.0      | 1.10           | 0.08  | 4.60e-04   | 4.34e-08 | 232.5      | 1.11           | 0.08  | 4.63e-04   | 4.36e-08 |
| RbF                         | 376.0      | 1.90           | 0.21  | 1.52e-03   | 2.68e-07 | 369.9      | 2.34           | 0.20  | 1.51e-03   | 2.25e-07 | 365.3      | 2.32           | 0.20  | 1.52e-03   | 2.27e-07 |
| RbI                         | 138.5      | 0.34           | 0.03  | 1.09e-04   | 7.38e-09 | 136.8      | 0.42           | 0.03  | 1.13e-04   | 6.66e-09 | 137.7      | 0.43           | 0.03  | 1.13e-04   | 6.68e-09 |
| NaBr                        | 302.1      | 1.50           | 0.15  | 9.41e-04   | 1.55e-07 | 291.5      | 1.65           | 0.15  | 1.13e-03   | 1.58e-07 | 293.4      | 1.70           | 0.15  | 1.13e-03   | 1.56e-07 |
| NaCl                        | 366.0      | 2.05           | 0.22  | 6.25e-03   | 3.12e-07 | 354.8      | 3.29           | 0.22  | 2.13e-03   | 3.24e-07 | 355.0      | 3.26           | 0.22  | 2.11e-03   | 3.21e-07 |
| NaF                         | 536.0      | 3.40           | 0.44  | 4.56e-03   | 1.16e-06 | 524.5      | 5.58           | 0.43  | 5.36e-03   | 1.20e-06 | 517.2      | 5.42           | 0.43  | 5.32e-03   | 1.20e-06 |
| NaH                         | 1176.0     | 21.20          | 4.89  | 1.31e-01   | 3.32e-04 | 1163.0     | 25.37          | 4.94  | 1.06e-01   | 3.56e-04 | 1191.8     | 23.15          | 4.96  | 9.67e-02   | 3.43e-04 |
| NaI                         | 258.0      | 1.08           | 0.12  | 6.48e-04   | 9.73e-08 | 248.3      | 0.69           | 0.11  | 5.30e-04   | 9.81e-08 | 248.4      | 0.71           | 0.11  | 5.52e-04   | 9.85e-08 |
| SH                          | 2711.6     | 59.90          | 9.46  | 2.70e-01   | 4.80e-04 | 2707.0     | 59.34          | 9.59  | 2.95e-01   | 4.82e-04 | 2781.9     | 54.08          | 9.69  | 2.77e-01   | 4.70e-04 |
| SF                          | 837.6      | 4.47           | 0.56  | 4.59e-03   | 9.75e-07 | 836.3      | 5.42           | 0.55  | 4.47e-03   | 9.27e-07 | 850.0      | 5.16           | 0.55  | 4.36e-03   | 9.11e-07 |
| SO                          | 1149.2     | 5.63           | 0.72  | 5.74e-03   | 1.13e-06 | 1138.4     | 7.13           | 0.70  | 5.71e-03   | 1.08e-06 | 1074.9     | -1.73          | 0.69  | 4.65e-03   | 1.13e-06 |

Table S5 Percent deviation for Vibrational harmonic frequency  $\omega_e$ , First anharmonic correction  $\omega_e x_e$ , Equilibrium rotational constant  $B_e$ , First correction of the rotational constant  $\alpha_e$ , Centrifugal distortion constant  $D_e$ , for different methods and analytical potentials fitted on CCSD(T) without energy threshold, from the reference indicated below.

| Method               | Reference: | Experiment     |       |            |       | CCSD(T)    |                |       |            |       |
|----------------------|------------|----------------|-------|------------|-------|------------|----------------|-------|------------|-------|
|                      | $\omega_e$ | $\omega_e x_e$ | $B_e$ | $\alpha_e$ | $D_e$ | $\omega_e$ | $\omega_e x_e$ | $B_e$ | $\alpha_e$ | $D_e$ |
| CCSD(T)              | 2.92       | 28.07          | 2.76  | 14.64      | 26.91 |            |                |       |            |       |
| MP2                  | 6.59       | 40.35          | 2.46  | 21.09      | 28.19 | 6.25       | 27.84          | 2.14  | 18.30      | 9.39  |
| Sun                  | 2.96       | 27.38          | 2.76  | 14.48      | 26.92 | 0.05       | 1.01           | 0.01  | 0.39       | 0.10  |
| Hulburt-Hirschfelder | 2.94       | 26.86          | 2.76  | 14.18      | 26.91 | 0.06       | 1.84           | 0.02  | 0.75       | 0.12  |
| Wei-Hua              | 2.89       | 26.19          | 2.76  | 14.01      | 26.91 | 0.10       | 4.93           | 0.06  | 2.23       | 0.18  |
| Tietz-II             | 2.87       | 26.14          | 2.76  | 13.93      | 26.90 | 0.13       | 4.87           | 0.06  | 2.31       | 0.29  |
| Rafi                 | 2.86       | 25.89          | 2.77  | 13.59      | 26.90 | 0.20       | 3.15           | 0.05  | 2.75       | 0.49  |
| Levine               | 2.88       | 26.20          | 2.76  | 14.07      | 26.92 | 0.28       | 6.78           | 0.07  | 4.78       | 0.63  |
| Murrell-Sorbie       | 2.98       | 30.48          | 2.75  | 14.42      | 26.97 | 0.45       | 5.90           | 0.05  | 2.09       | 0.80  |
| Cahill               | 3.02       | 30.07          | 2.75  | 14.29      | 26.99 | 0.48       | 4.61           | 0.03  | 1.69       | 0.89  |
| Deng-Fan             | 2.93       | 28.22          | 2.77  | 16.69      | 26.93 | 0.56       | 12.63          | 0.13  | 9.74       | 1.08  |
| Morse                | 2.91       | 30.79          | 2.73  | 12.31      | 27.01 | 0.69       | 11.87          | 0.09  | 3.68       | 1.21  |
| Frost-Musulin        | 2.88       | 28.19          | 2.75  | 12.40      | 26.99 | 0.71       | 10.52          | 0.09  | 3.93       | 1.31  |
| Poschl-Teller        | 2.88       | 28.93          | 2.74  | 12.24      | 27.01 | 0.76       | 10.78          | 0.09  | 3.97       | 1.39  |
| Linnett              | 2.90       | 28.47          | 2.74  | 12.72      | 26.96 | 0.77       | 11.87          | 0.10  | 4.24       | 1.39  |
| Tietz-I              | 3.07       | 23.69          | 2.87  | 15.24      | 26.91 | 0.79       | 16.21          | 0.37  | 9.14       | 1.81  |
| Rydberg              | 2.91       | 32.90          | 2.71  | 12.09      | 27.07 | 0.85       | 12.85          | 0.10  | 3.86       | 1.49  |
| Valence-State        | 3.06       | 23.01          | 2.80  | 13.67      | 26.80 | 0.87       | 11.26          | 0.10  | 4.41       | 1.61  |
| Varshni              | 2.90       | 33.90          | 2.70  | 13.34      | 27.13 | 1.03       | 13.40          | 0.12  | 6.25       | 1.83  |
| Rosen-Morse          | 2.93       | 33.28          | 2.71  | 11.75      | 27.11 | 1.06       | 13.22          | 0.10  | 4.36       | 1.90  |
| Tang2003a            | 2.83       | 31.81          | 2.75  | 17.70      | 27.10 | 1.07       | 17.72          | 0.42  | 15.43      | 2.42  |
| Pseudo-Gaussian      | 2.95       | 35.71          | 2.68  | 11.76      | 27.21 | 1.23       | 14.29          | 0.12  | 4.56       | 2.15  |
| Noorizadeh           | 2.99       | 40.61          | 2.99  | 30.54      | 27.23 | 1.30       | 36.89          | 1.03  | 30.52      | 3.58  |
| Kratzer              | 2.39       | 60.84          | 4.10  | 49.58      | 27.73 | 1.91       | 65.99          | 1.95  | 51.67      | 5.65  |
| Buckingham           | 3.67       | 65.22          | 2.86  | 27.03      | 27.04 | 2.15       | 49.12          | 0.40  | 24.64      | 3.85  |
| Wang-Buckingham      | 3.93       | 65.38          | 2.55  | 13.59      | 27.81 | 2.98       | 40.75          | 0.28  | 10.46      | 5.05  |
| Lippincott           | 2.26       | 95.12          | 5.49  | 99.75      | 29.70 | 3.02       | 95.84          | 3.66  | 99.75      | 11.34 |
| Harmonic             | 3.48       | -              | -     | -          | -     | 4.87       | -              | -     | -          | -     |
| Xie2005a             | 3.60       | 87.68          | 5.68  | 100        | 31.91 | 5.02       | 89.16          | 3.89  | 100        | 16.11 |
| Lennard-Jones        | 16.84      | 100            | 7.34  | 100        | 77.03 | 16.09      | 100            | 7.71  | 100        | 55.95 |



Table S6 Percent deviation for Vibrational harmonic frequency  $\omega_e$ , First anharmonic correction  $\omega_e x_e$ , Equilibrium rotational constant  $B_e$ , First correction of the rotational constant  $\alpha_e$ , Centrifugal distortion constant  $D_e$ , for different methods and analytical potentials fitted on CCSD(T) with an energy threshold of 5000  $\text{cm}^{-1}$ , from the reference indicated below.

| Reference:           | Experiment |                |       |            |       | CCSD(T)    |                |       |            |       |
|----------------------|------------|----------------|-------|------------|-------|------------|----------------|-------|------------|-------|
| Method               | $\omega_e$ | $\omega_e x_e$ | $B_e$ | $\alpha_e$ | $D_e$ | $\omega_e$ | $\omega_e x_e$ | $B_e$ | $\alpha_e$ | $D_e$ |
| CCSD(T)              | 2.91       | 24.90          | 2.77  | 13.76      | 26.94 |            |                |       |            |       |
| MP2                  | 6.60       | 39.61          | 2.46  | 19.96      | 28.20 | 6.27       | 31.04          | 2.14  | 18.26      | 9.36  |
| Sun                  | 2.92       | 24.75          | 2.76  | 13.84      | 26.95 | 0.02       | 0.27           | 0.00  | 0.25       | 0.05  |
| Hulburt-Hirschfelder | 2.95       | 23.79          | 2.77  | 13.48      | 26.96 | 0.08       | 1.58           | 0.01  | 0.56       | 0.13  |
| Tietz-II             | 2.94       | 22.55          | 2.77  | 12.96      | 26.95 | 0.11       | 3.68           | 0.05  | 2.08       | 0.18  |
| Cahill               | 2.93       | 25.08          | 2.75  | 13.26      | 26.96 | 0.18       | 2.21           | 0.02  | 1.70       | 0.37  |
| Wei-Hua              | 3.05       | 22.07          | 2.78  | 12.87      | 26.99 | 0.23       | 5.44           | 0.05  | 2.10       | 0.37  |
| Murrell-Sorbie       | 2.96       | 26.34          | 2.76  | 13.60      | 26.99 | 0.31       | 4.52           | 0.03  | 2.48       | 0.61  |
| Levine               | 3.01       | 22.28          | 2.77  | 12.87      | 27.00 | 0.32       | 6.68           | 0.05  | 3.07       | 0.63  |
| Deng-Fan             | 2.90       | 25.67          | 2.77  | 16.52      | 26.98 | 0.38       | 9.49           | 0.11  | 9.71       | 0.88  |
| Tietz-I              | 3.01       | 20.83          | 2.77  | 13.42      | 26.94 | 0.47       | 8.54           | 0.07  | 5.05       | 1.01  |
| Morse                | 2.88       | 25.57          | 2.76  | 12.10      | 27.02 | 0.48       | 7.19           | 0.05  | 3.91       | 0.97  |
| Valence-State        | 3.01       | 21.90          | 2.77  | 13.56      | 26.92 | 0.52       | 6.92           | 0.05  | 4.38       | 1.08  |
| Frost-Musulin        | 2.87       | 24.17          | 2.76  | 12.33      | 27.02 | 0.52       | 6.41           | 0.05  | 3.83       | 1.07  |
| Poschl-Teller        | 2.87       | 24.55          | 2.76  | 12.22      | 27.03 | 0.56       | 6.57           | 0.05  | 3.96       | 1.13  |
| Rydberg              | 2.86       | 26.47          | 2.75  | 11.95      | 27.05 | 0.56       | 7.75           | 0.05  | 4.42       | 1.14  |
| Linnett              | 2.90       | 28.22          | 2.75  | 12.30      | 27.00 | 0.62       | 12.11          | 0.05  | 3.90       | 1.20  |
| Varshni              | 2.83       | 26.42          | 2.76  | 13.37      | 27.08 | 0.64       | 8.19           | 0.08  | 6.86       | 1.33  |
| Rosen-Morse          | 2.88       | 27.42          | 2.75  | 11.91      | 27.08 | 0.73       | 8.74           | 0.05  | 4.76       | 1.46  |
| Pseudo-Gaussian      | 2.83       | 27.00          | 2.76  | 12.01      | 27.11 | 0.74       | 8.05           | 0.06  | 5.80       | 1.51  |
| Tang2003a            | 2.83       | 26.57          | 2.74  | 16.86      | 27.01 | 0.85       | 14.81          | 0.25  | 15.07      | 1.45  |
| Rafi                 | 3.25       | 25.14          | 2.79  | 18.82      | 27.04 | 0.90       | 12.07          | 0.33  | 13.78      | 0.96  |
| Buckingham           | 3.25       | 62.56          | 2.80  | 26.11      | 27.10 | 1.58       | 45.62          | 0.33  | 24.48      | 2.99  |
| Noorizadeh           | 3.35       | 42.76          | 2.80  | 34.92      | 27.02 | 1.89       | 40.76          | 0.64  | 34.38      | 2.43  |
| Wang-Buckingham      | 3.24       | 52.11          | 2.70  | 16.15      | 27.48 | 1.95       | 32.96          | 0.12  | 14.45      | 3.81  |
| Lippincott           | 3.71       | 74.28          | 4.40  | 100        | 28.46 | 2.09       | 67.01          | 2.34  | 100        | 7.40  |
| Kratzer              | 3.87       | 59.90          | 3.63  | 49.84      | 26.85 | 2.55       | 64.11          | 1.29  | 50.18      | 2.80  |
| Xie2005a             | 5.39       | 86.94          | 4.48  | 100        | 27.11 | 4.86       | 88.49          | 2.41  | 100        | 6.59  |
| Harmonic             | 5.65       | -              | -     | -          | -     | 5.07       | -              | -     | -          | -     |
| Lennard-Jones        | 15.25      | 100            | 4.89  | 100        | 30.34 | 14.96      | 100            | 5.19  | 100        | 12.46 |

Table S7 Percent deviation for Vibrational harmonic frequency  $\omega_e$ , First anharmonic correction  $\omega_e x_e$ , Equilibrium rotational constant  $B_e$ , First correction of the rotational constant  $\alpha_e$ , Centrifugal distortion constant  $D_e$ , for different methods and analytical potentials fitted on experimental data without energy threshold, from the reference indicated below.

| Method               | Reference: | Experiment     |       |            |       |
|----------------------|------------|----------------|-------|------------|-------|
|                      | $\omega_e$ | $\omega_e x_e$ | $B_e$ | $\alpha_e$ | $D_e$ |
| Sun                  | 0.38       | 26.76          | 0.68  | 11.88      | 1.45  |
| Murrell-Sorbie       | 1.20       | 22.70          | 0.74  | 9.75       | 2.28  |
| Pseudo-Gaussian      | 1.42       | 15.53          | 1.70  | 15.70      | 4.83  |
| Varshni              | 1.38       | 27.24          | 0.96  | 19.22      | 5.12  |
| Hulburt-Hirschfelder | 1.17       | 21.39          | 0.78  | 9.16       | 1.94  |
| Levine               | 1.50       | 19.69          | 0.75  | 10.32      | 3.39  |
| Rafi                 | 1.39       | 20.03          | 0.70  | 10.91      | 4.07  |
| Poschl-Teller        | 1.86       | 22.48          | 0.74  | 10.29      | 4.07  |
| Rydberg              | 1.98       | 18.29          | 1.11  | 14.63      | 7.32  |
| Noorizadeh           | 1.90       | 19.96          | 0.68  | 8.74       | 4.67  |
| Wei-Hua              | 1.97       | 26.07          | 0.65  | 8.22       | 3.47  |
| Morse                | 2.17       | 22.18          | 0.81  | 11.42      | 5.90  |
| Frost-Musulin        | 2.12       | 28.61          | 0.90  | 14.04      | 3.87  |
| Linnett              | 2.18       | 52.00          | 1.97  | 38.93      | 12.20 |
| Tietz-II             | 2.90       | 25.01          | 0.65  | 9.52       | 5.72  |
| Valence-State        | 2.52       | 55.08          | 2.14  | 35.84      | 8.69  |
| Lippincott           | 3.52       | 25.62          | 11.54 | 100        | 36.19 |
| Cahill               | 3.27       | 85.69          | 1.51  | 43.28      | 7.56  |
| Deng-Fan             | 3.34       | 59.13          | 2.20  | 38.12      | 7.74  |
| Tang2003a            | 3.57       | 21.10          | 0.78  | 12.12      | 8.19  |
| Tietz-I              | 3.44       | 60.27          | 2.26  | 39.74      | 8.08  |
| Rosen-Morse          | 5.15       | 19.36          | 1.13  | 20.28      | 12.58 |
| Buckingham           | 6.09       | 100            | 6.82  | 98.79      | 27.51 |
| Kratzer              | 11.00      | 60.98          | 5.23  | 42.76      | 10.99 |
| Harmonic             | 20.42      | -              | -     | -          | -     |
| Xie2005a             | 21.28      | 83.07          | 11.31 | 95.59      | 17.33 |
| Wang-Buckingham      | 26.43      | 70.84          | 2.03  | 43.54      | 26.57 |
| Lennard-Jones        | 66.23      | 100            | 22.68 | 100        | 35.37 |

Table S8 Vibrational properties: Ground state frequency  $\omega_e$  (1/cm) Anharmonic frequency  $\omega_e x_e$  (1/cm) Rotational constant in equilibrium position  $B_e$  (1/cm) Rotational constant - first term  $\alpha_e$  (1/cm) Centrifugal distortion constant  $D_e$  (1/cm) from experiment<sup>1</sup> or computed using Psi4<sup>28</sup> based on experimental data. Root Mean Square Deviation (RMSD) and Mean Signed Error (MSE) are given at the bottom.

| Molecule                    | $\omega_e$ |        | $\omega_e x_e$ |        | $B_e$ |       | $\alpha_e$ |          | $D_e$    |           |
|-----------------------------|------------|--------|----------------|--------|-------|-------|------------|----------|----------|-----------|
|                             | Exper      | Psi4   | Exper          | Psi4   | Exper | Psi4  | Exper      | Psi4     | Exper    | Psi4      |
| C <sub>2</sub>              | 1854.7     | 1880.2 | 13.34          | 14.92  | 1.82  | 1.81  | 1.76e-02   | 1.82e-02 | 6.92e-06 | 6.76e-06  |
| CF                          | 1308.1     | 1322.6 | 11.10          | 14.84  | 1.42  | 1.42  | 1.84e-02   | 2.00e-02 | 6.50e-06 | 6.49e-06  |
| CH                          | 2858.5     | 2920.8 | 63.02          | 83.63  | 14.46 | 14.73 | 5.34e-01   | 6.05e-01 | 1.45e-03 | 1.50e-03  |
| Li <sub>2</sub>             | 351.4      | 347.4  | 2.61           | 2.53   | 0.67  | 0.68  | 7.04e-03   | 7.11e-03 | 9.87e-06 | 1.03e-05  |
| LiH                         | 1405.5     | 1403.9 | 23.18          | 26.11  | 7.51  | 7.52  | 2.16e-01   | 2.25e-01 | 8.62e-04 | 8.65e-04  |
| CN                          | 2068.6     | 2084.7 | 13.09          | 15.69  | 1.90  | 1.90  | 1.74e-02   | 1.84e-02 | 6.40e-06 | 6.27e-06  |
| N <sub>2</sub> <sup>+</sup> | 2207.0     | 2220.7 | 16.10          | 18.47  | 1.93  | 1.93  | 1.88e-02   | 2.01e-02 | 6.10e-06 | 5.80e-06  |
| H <sub>2</sub>              | 4401.2     | 4403.2 | 121.34         | 146.94 |       | 60.61 | 3.06e+00   | 3.36e+00 | 4.71e-02 | 4.59e-02  |
| HF                          | 4138.3     | 4143.1 | 89.88          | 109.70 | 20.96 | 20.85 | 7.98e-01   | 8.44e-01 | 2.15e-03 | 2.11e-03  |
| I <sub>2</sub>              | 214.5      | 217.2  | 0.61           | 0.65   | 0.04  | 0.04  | 1.14e-04   | 1.11e-04 | 4.25e-09 | 4.19e-09  |
| O <sub>2</sub>              | 1580.2     | 1598.1 | 11.98          | 14.49  | 1.44  | 1.44  | 1.59e-02   | 1.67e-02 | 4.84e-06 | 4.72e-06  |
| N <sub>2</sub>              | 2358.6     | 2373.4 | 14.32          | 17.08  | 2.00  | 1.99  | 1.73e-02   | 1.83e-02 | 5.76e-06 | 5.60e-06  |
| CO                          | 2169.8     | 2176.6 | 13.29          | 16.14  | 1.93  | 1.92  | 1.75e-02   | 1.86e-02 | 6.12e-06 | 6.00e-06  |
| OH                          | 3737.8     | 3747.7 | 84.88          | 99.87  | 18.91 | 18.90 | 7.24e-01   | 7.76e-01 | 1.94e-03 | 1.92e-03  |
| NO                          | 1904.2     | 1919.3 | 14.07          | 17.01  | 1.67  | 1.70  | 1.71e-02   | 1.85e-02 | 5.40e-06 | 5.36e-06  |
| RMSD                        |            | 15.2   |                | 8.28   |       | 0.08  |            | 7.47e-02 |          | 2.90e-04  |
| MSE                         |            | 13.4   |                | 7.02   |       | 0.01  |            | 3.23e-02 |          | -7.75e-05 |

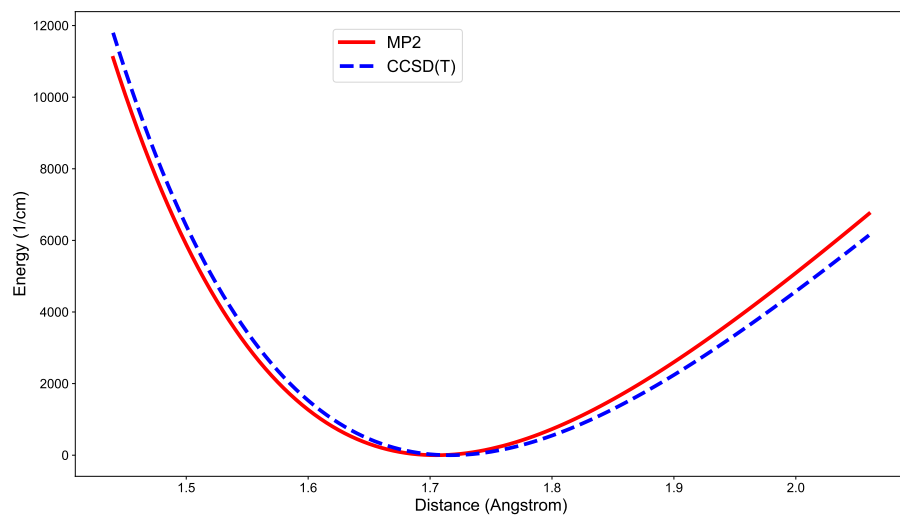

Fig. S1 Compound boron monochloride (BCl).

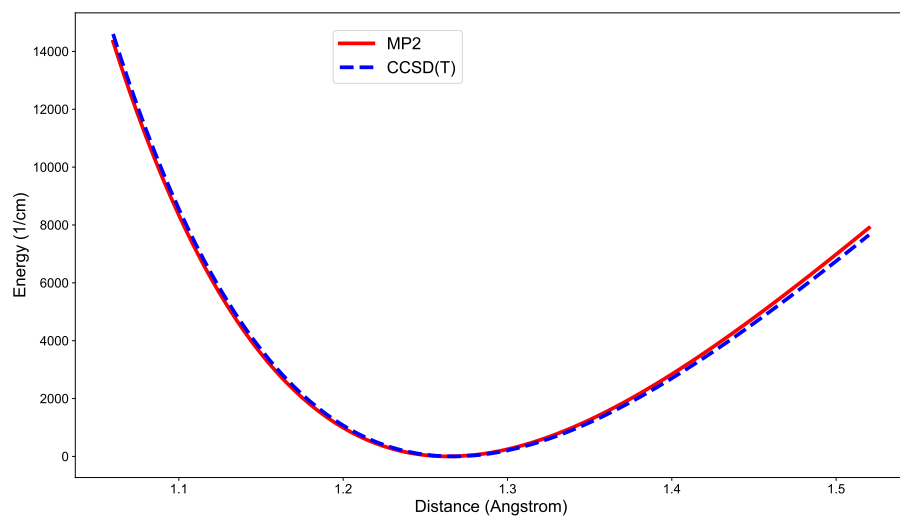

Fig. S2 Compound boron monofluoride (BF).

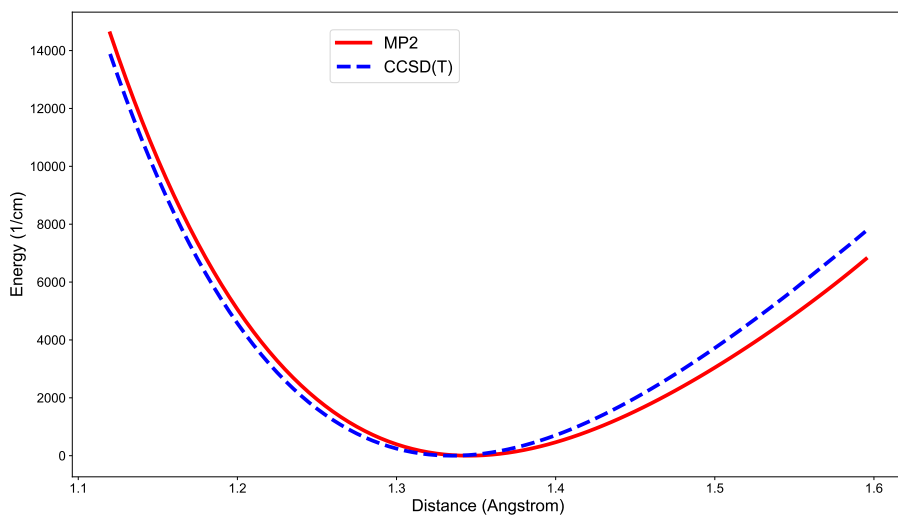

Fig. S3 Compound beryllium oxide (BeO).

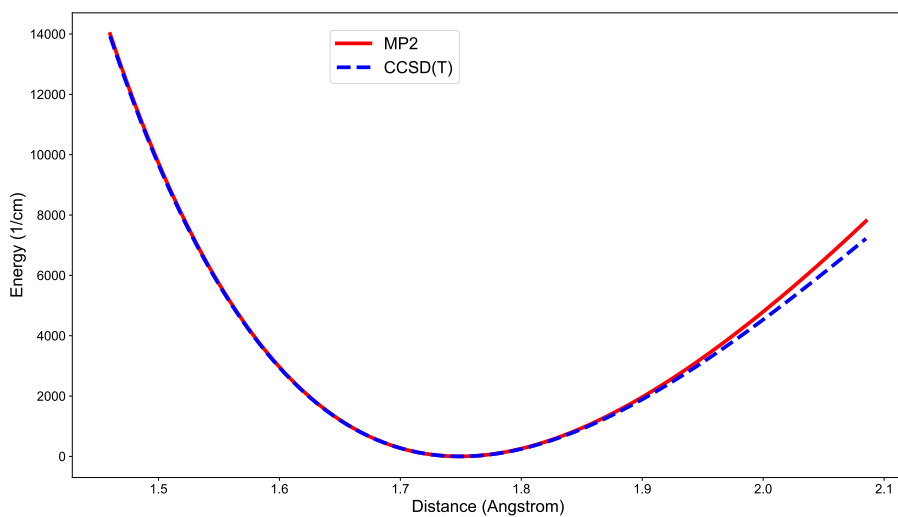

Fig. S4 Compound beryllium sulfide (BeS).

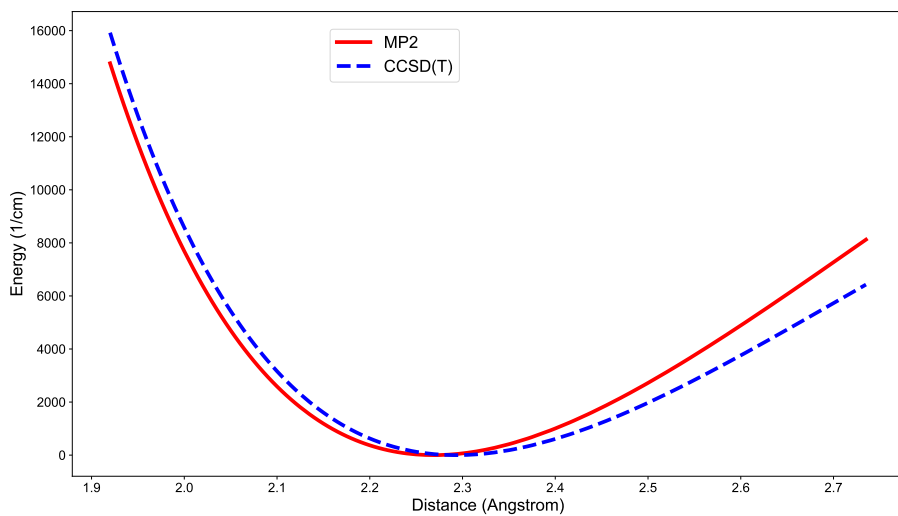

Fig. S5 Compound bromine (Br<sub>2</sub>).

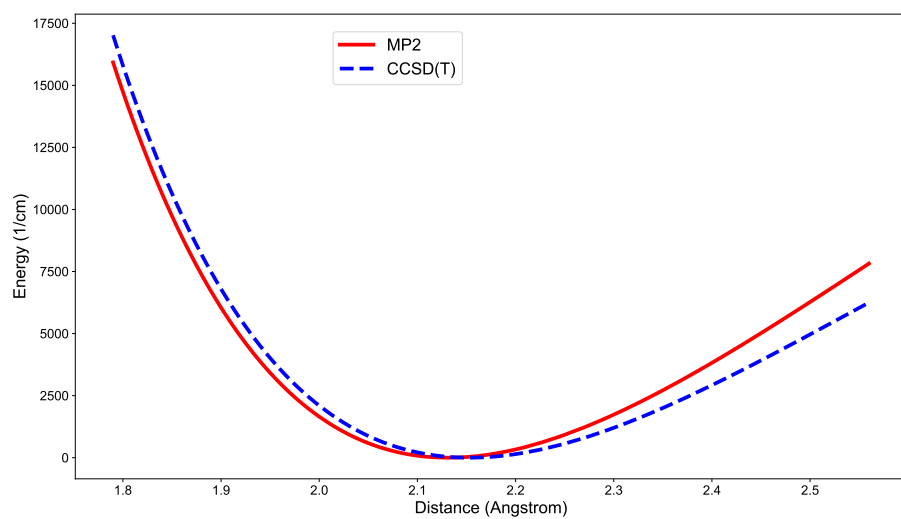

Fig. S6 Compound bromine chloride (BrCl).

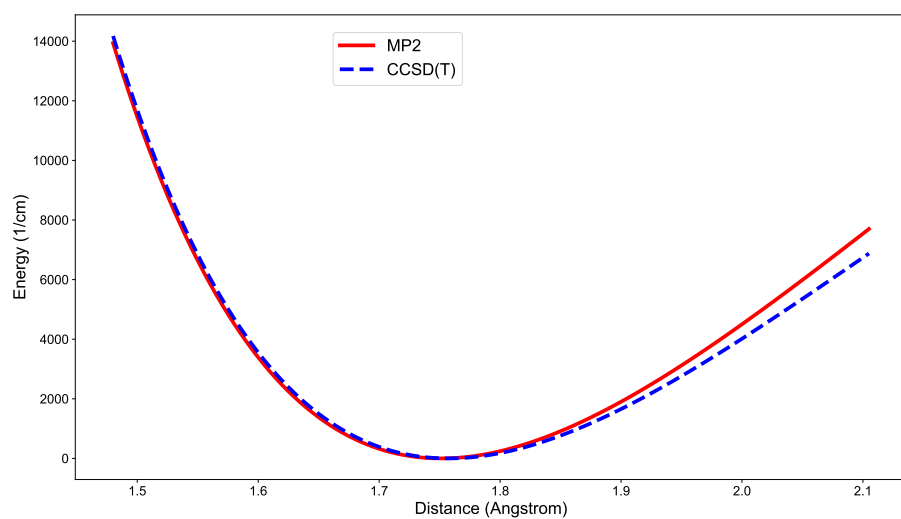

Fig. S7 Compound bromine fluoride (BrF).

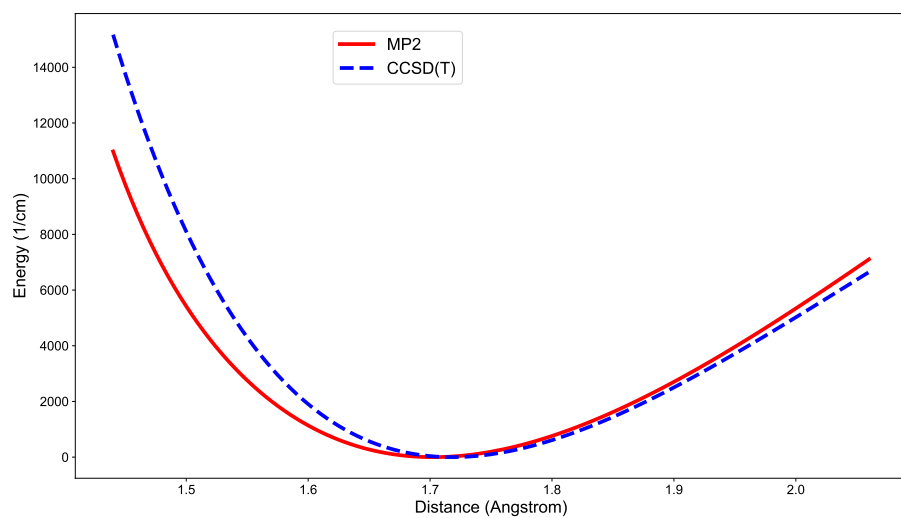

Fig. S8 Compound bromine monoxide (BrO).

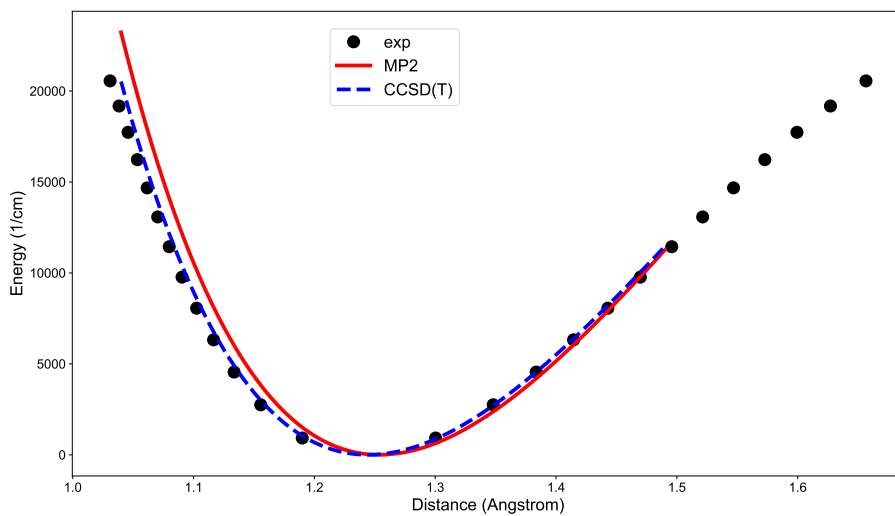

Fig. S9 Compound dicarbon ( $C_2$ ). Experimental data from ref. 29.

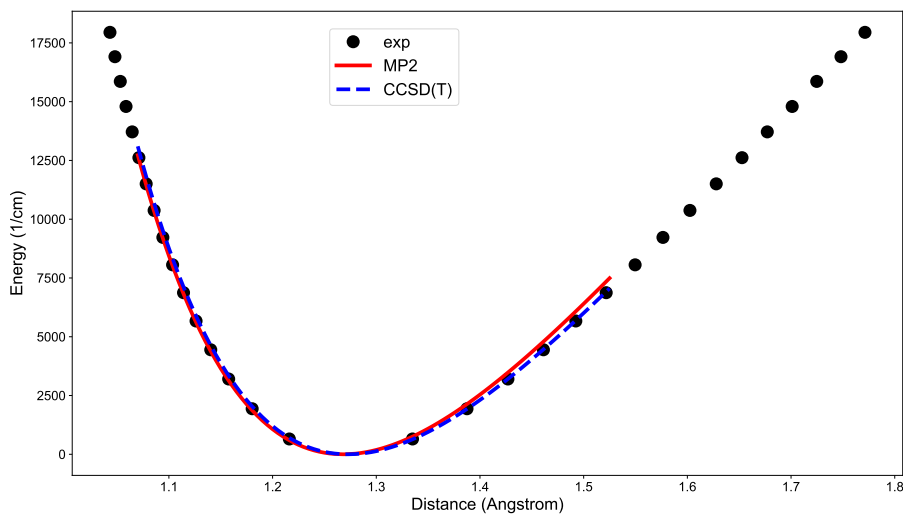

Fig. S10 Compound carbon monofluoride ( $CF$ ). Experimental data from ref. 29.

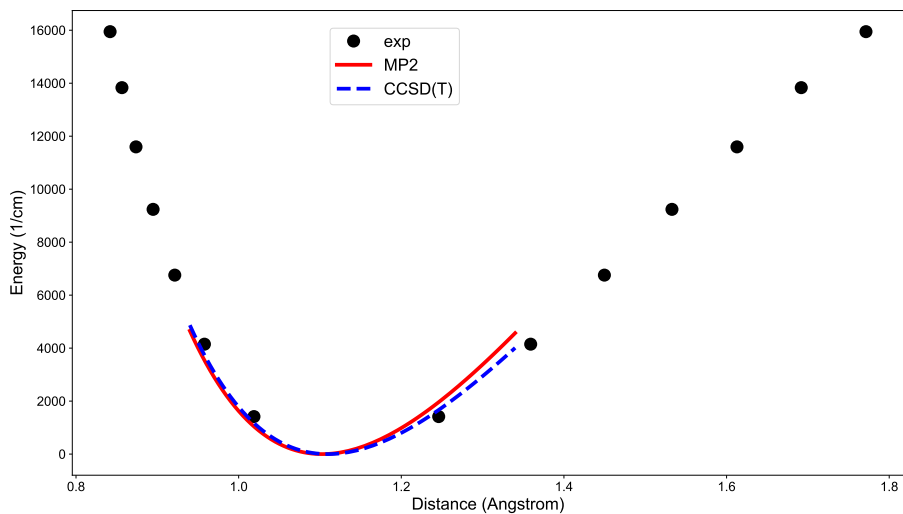

Fig. S11 Compound carbon monohydride ( $CH$ ). Experimental data from ref. 29.

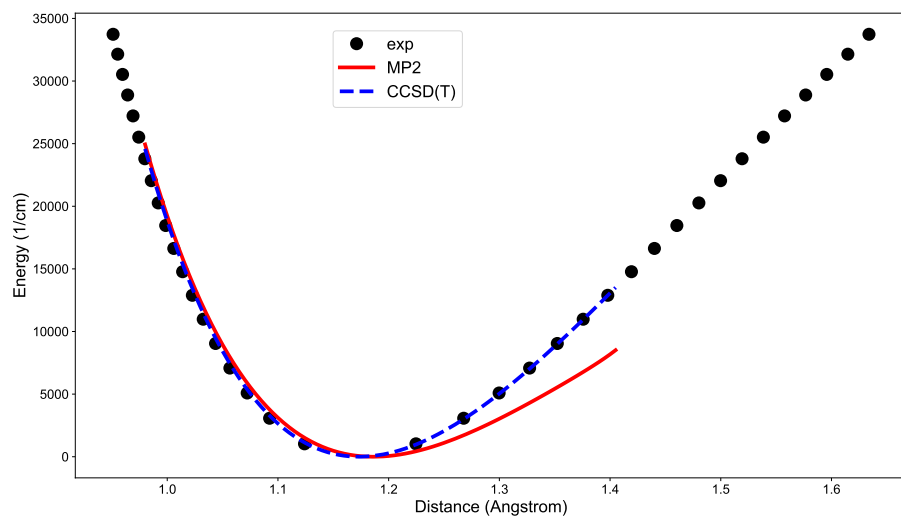

Fig. S12 Compound cyano radical (CN). Experimental data from ref. 29.

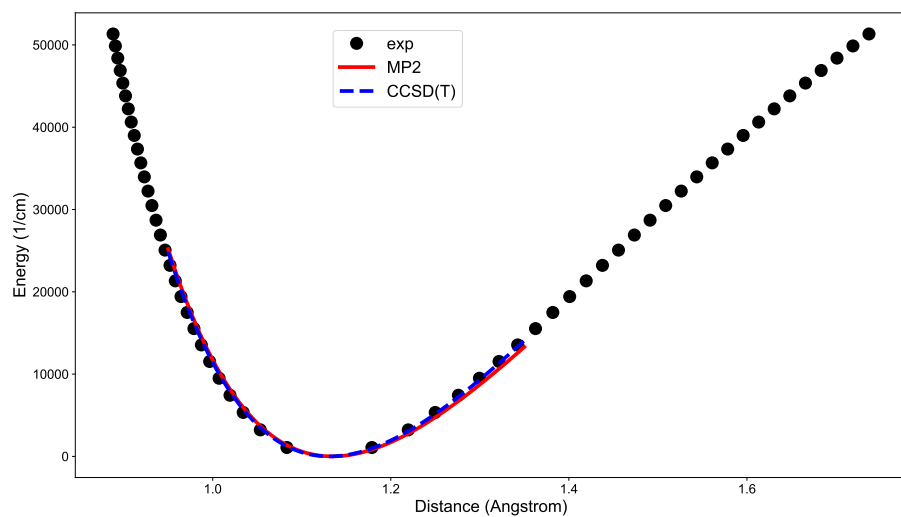

Fig. S13 Compound carbon monoxide (CO). Experimental data from ref. 30.

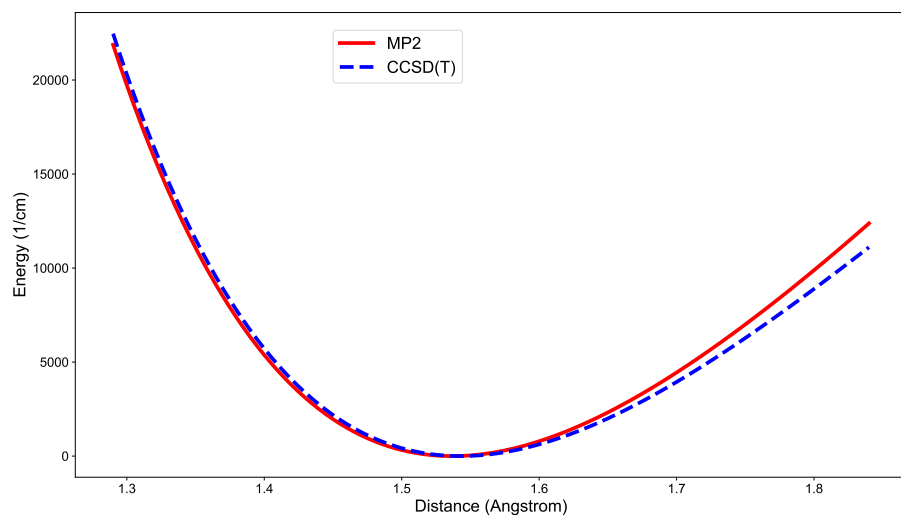

Fig. S14 Compound carbon monosulfide (CS).



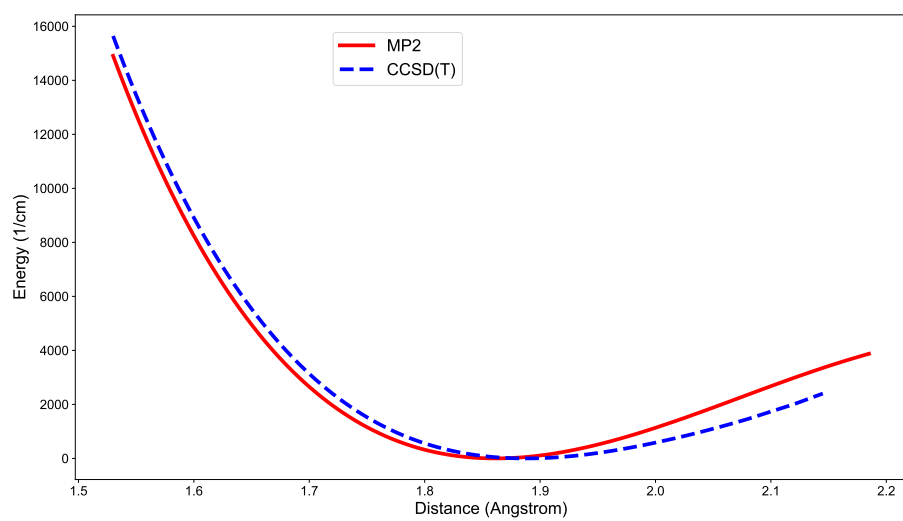

Fig. S15 Compound calcium oxide (CaO).



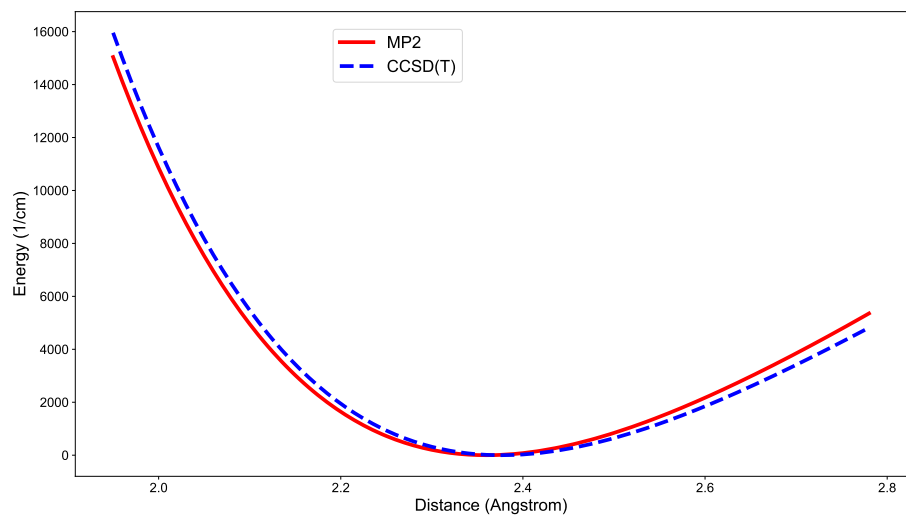

Fig. S16 Compound calcium sulfide (CaS).

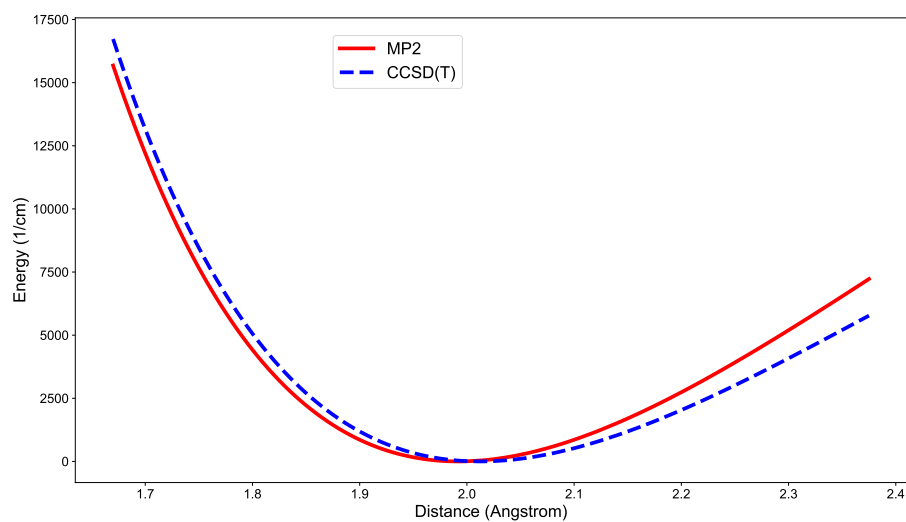

Fig. S17 Compound chlorine (Cl<sub>2</sub>).

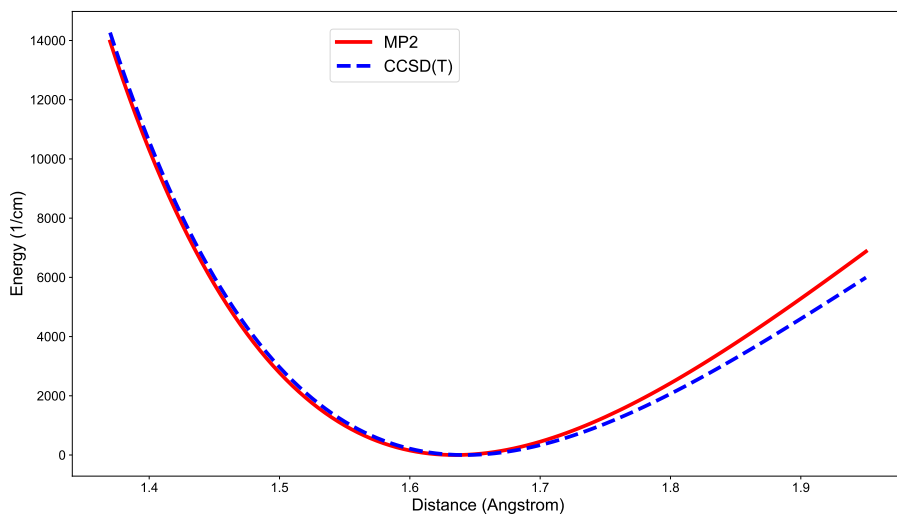

Fig. S18 Compound chlorine fluoride (ClF).

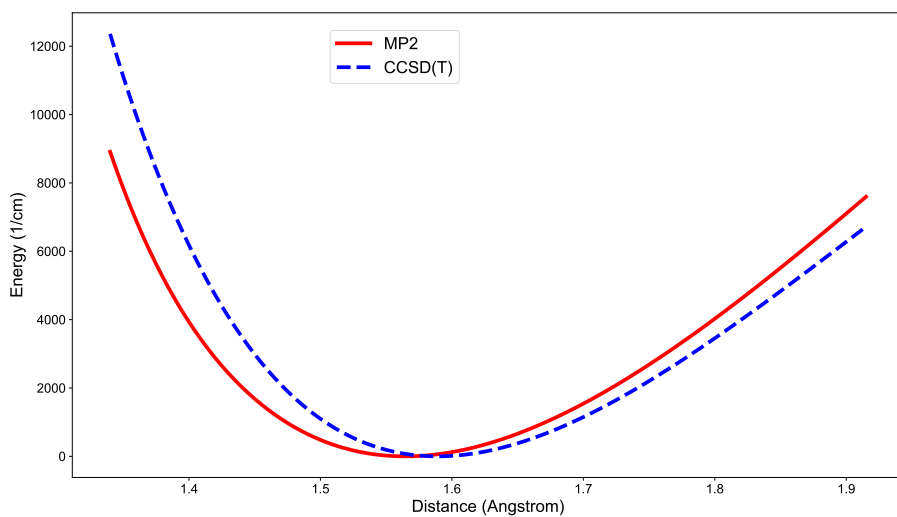

Fig. S19 Compound chlorine monoxide (ClO).

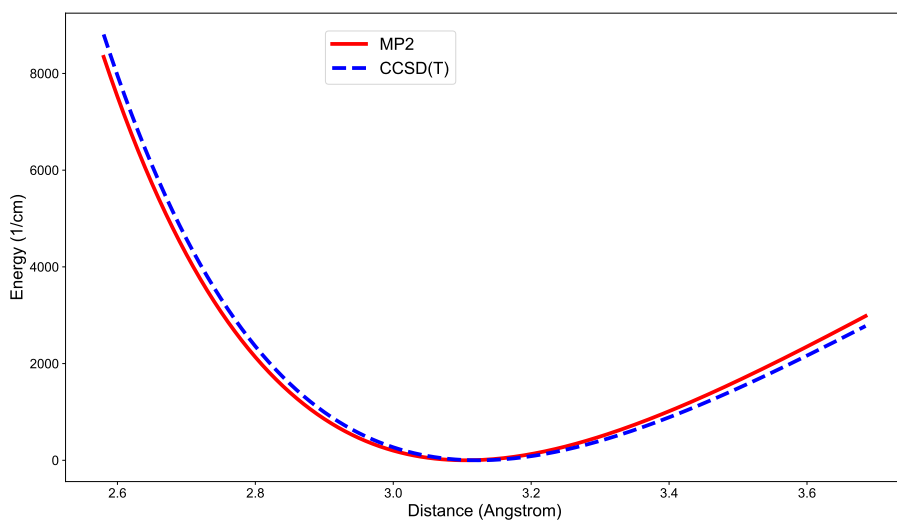

Fig. S20 Compound cesium bromide (CsBr).

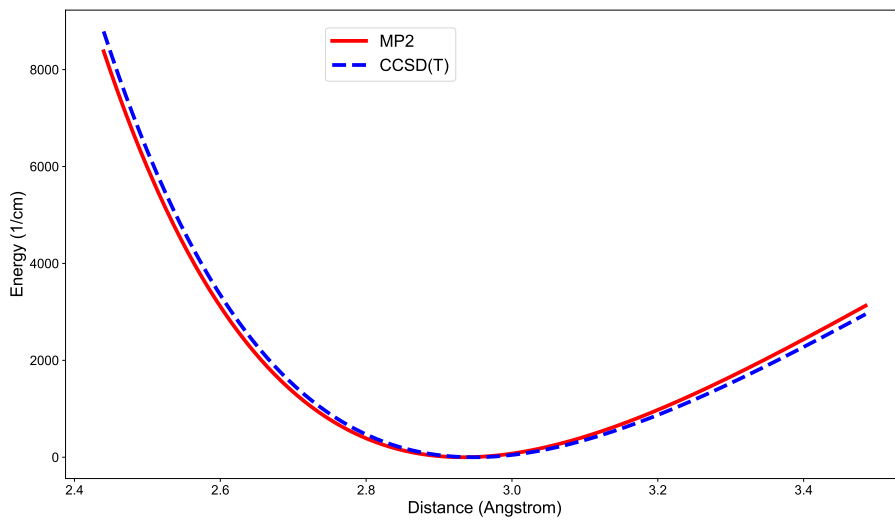

Fig. S21 Compound cesium chloride (CsCl).

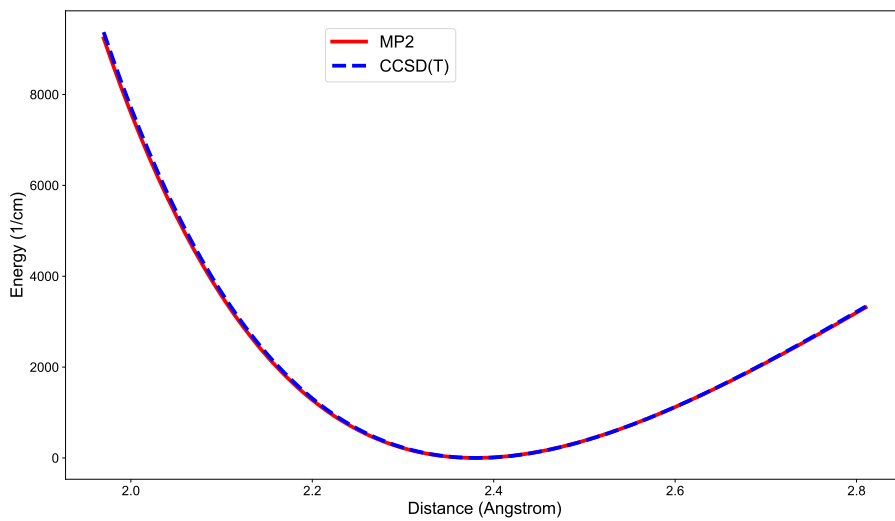

Fig. S22 Compound cesium fluoride (CsF).

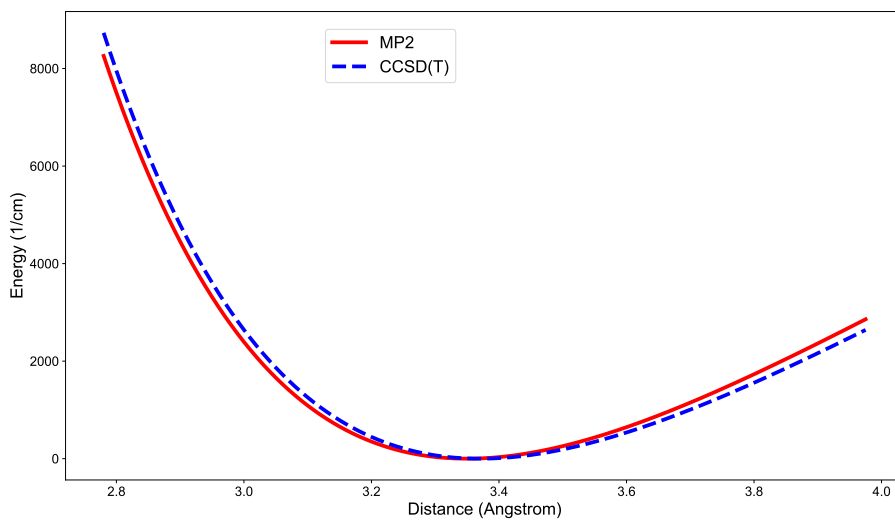

Fig. S23 Compound cesium iodide (CsI).

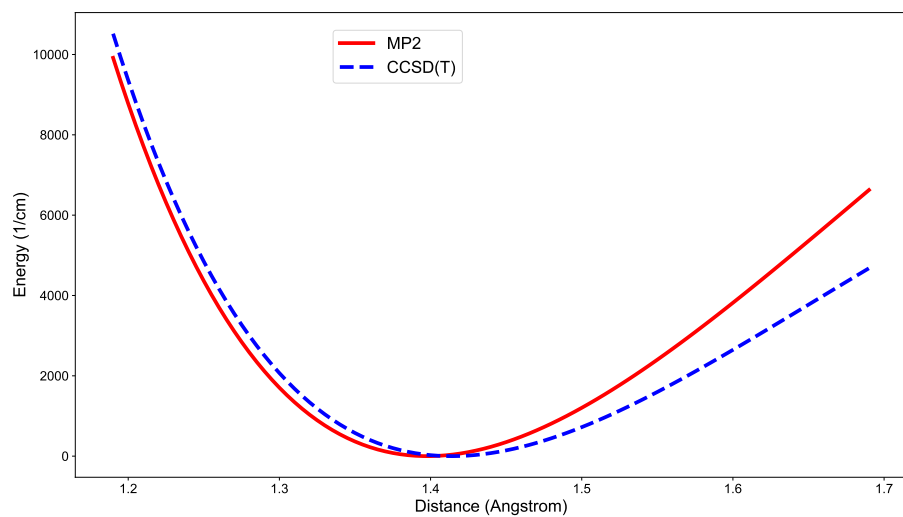

Fig. S24 Compound fluorine ( $F_2$ ).

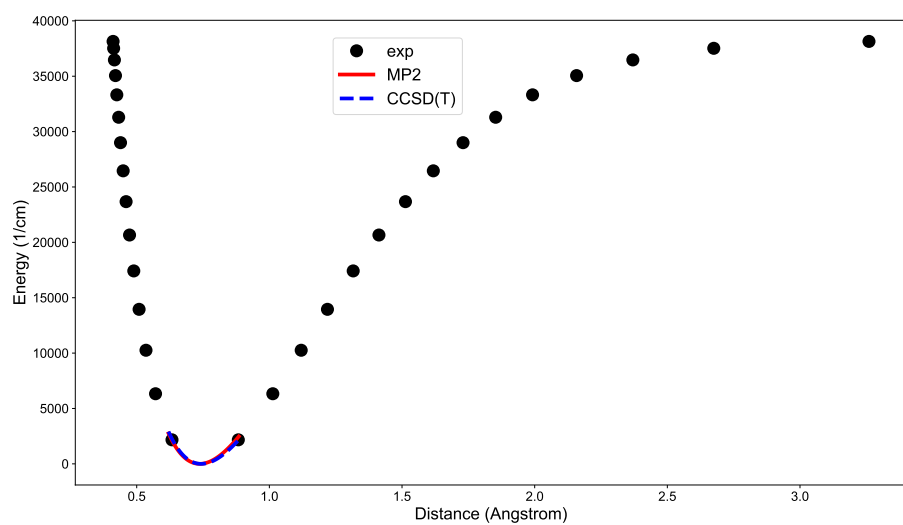

Fig. S25 Compound hydrogen ( $H_2$ ). Experimental data from ref. 31.

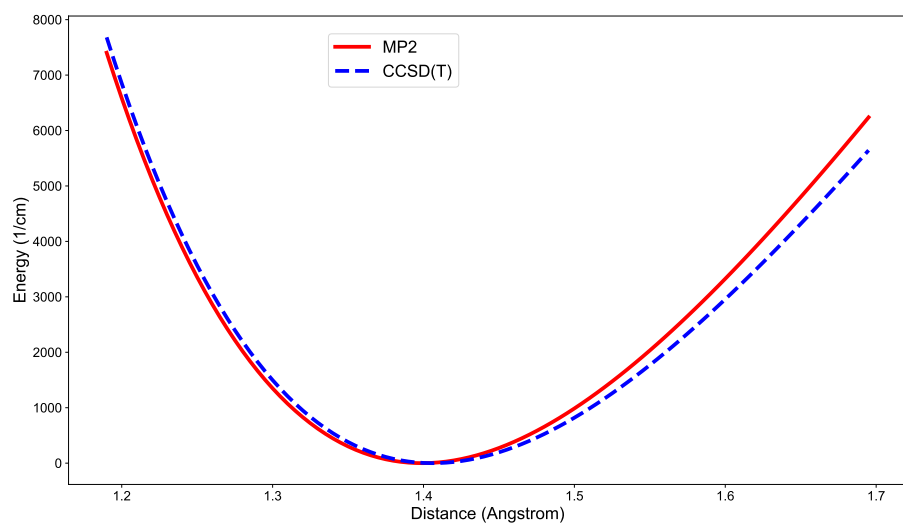

Fig. S26 Compound hydrogen bromide ( $HBr$ ).

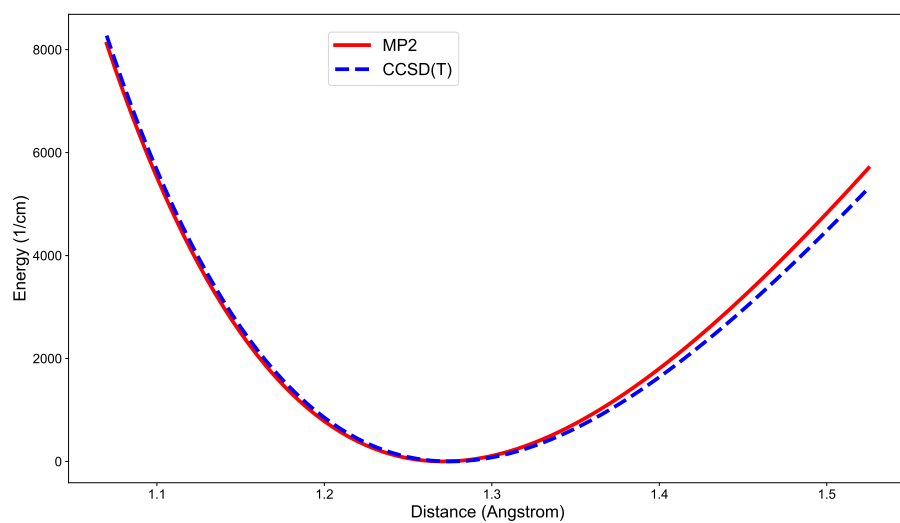

Fig. S27 Compound hydrogen chloride (HCl).

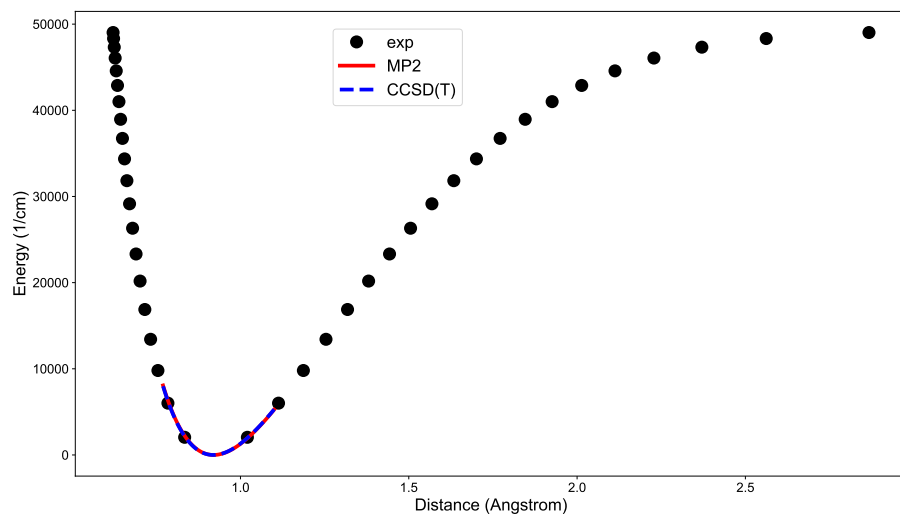

Fig. S28 Compound hydrogen fluoride (HF). Experimental data from ref. 32.

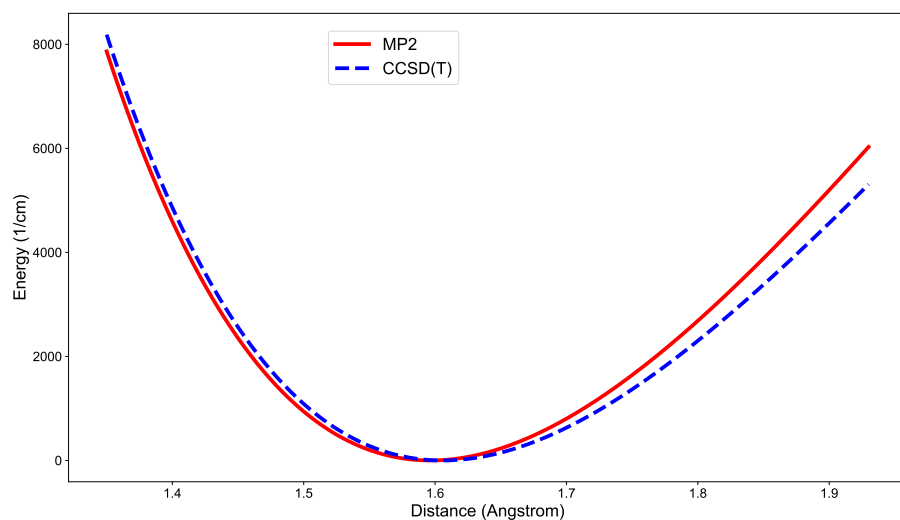

Fig. S29 Compound hydrogen iodide (HI).

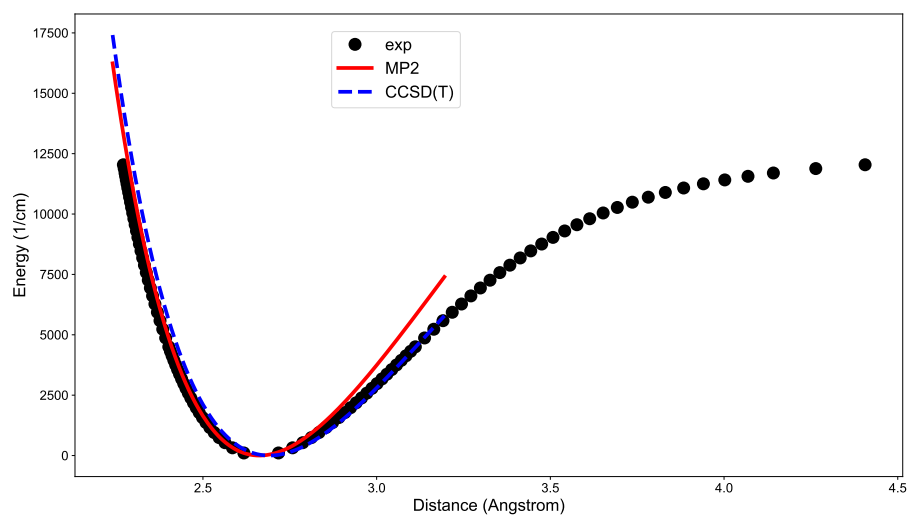

Fig. S30 Compound iodine (I<sub>2</sub>). Experimental data from ref. 31.



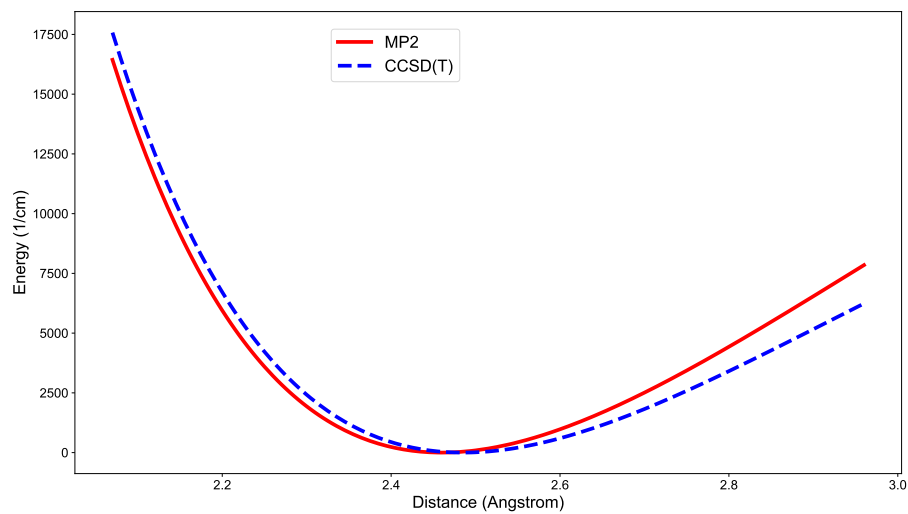

Fig. S31 Compound iodine bromide (IBr).

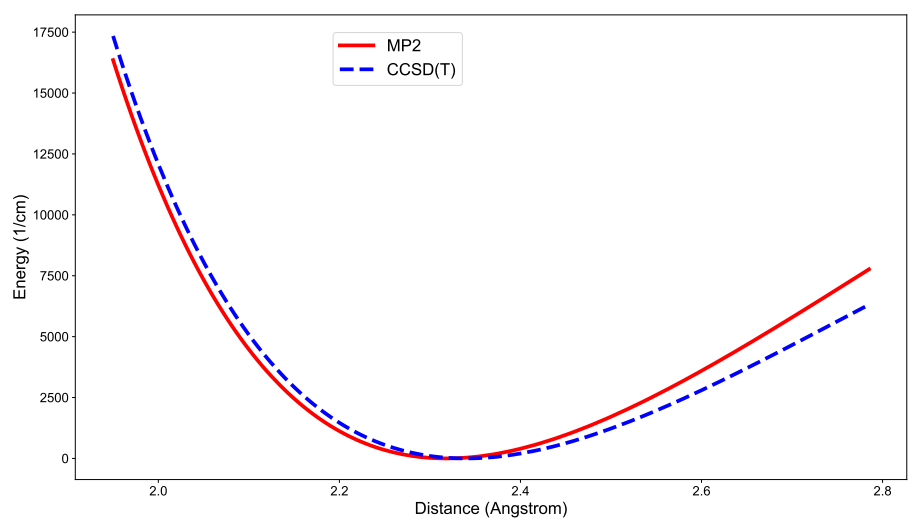

Fig. S32 Compound iodine chloride (ICl).

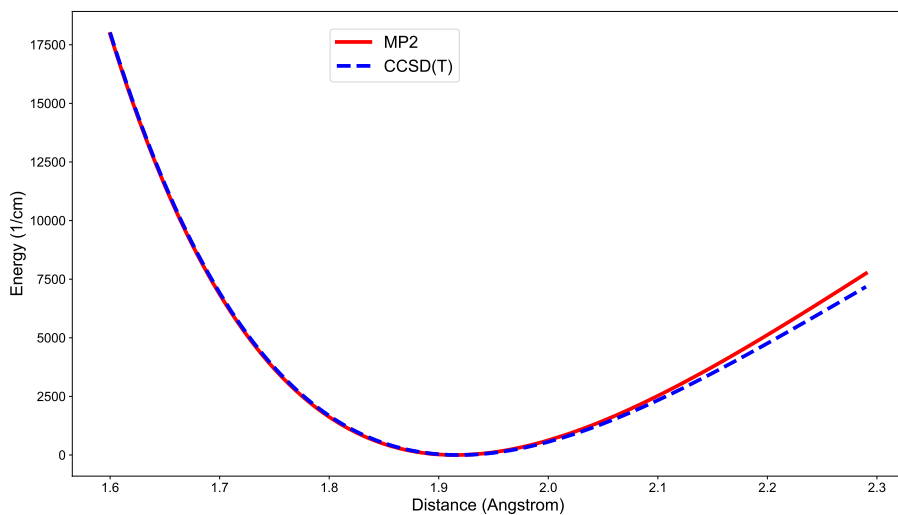

Fig. S33 Compound iodine fluoride (IF).

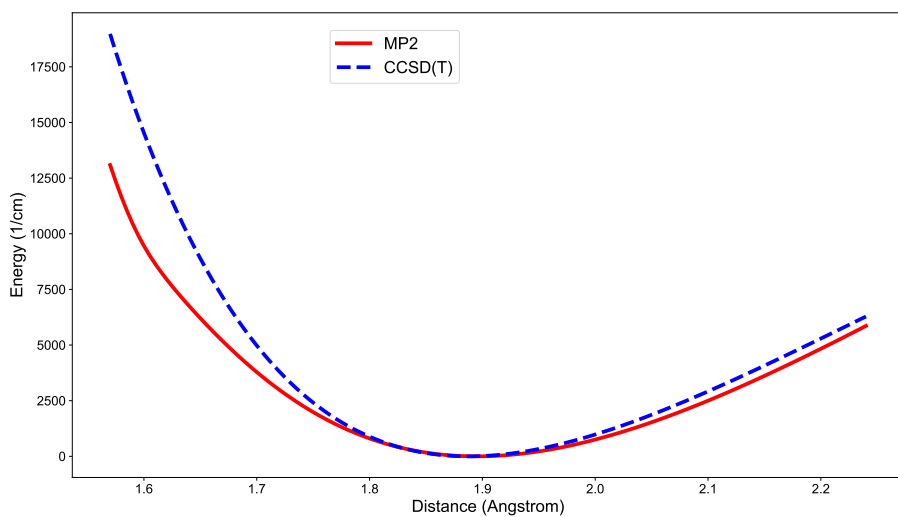

Fig. S34 Compound iodine monoxide (IO).

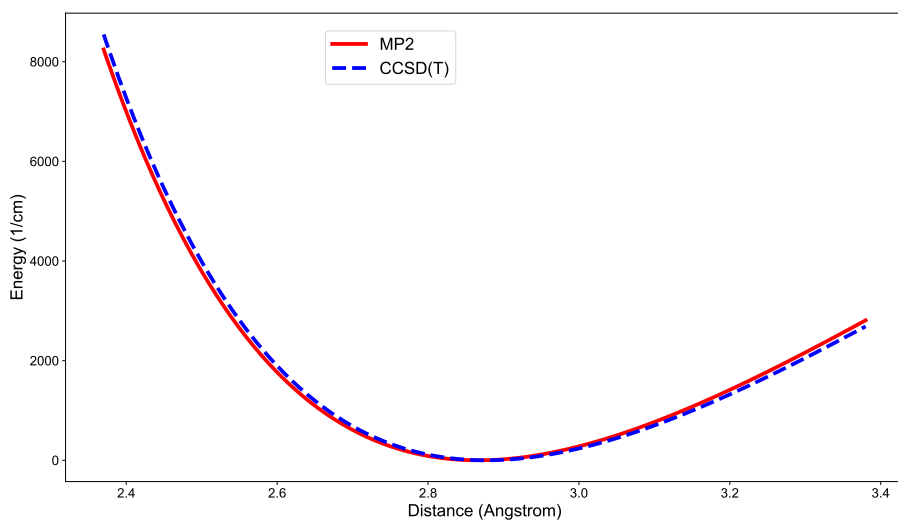

Fig. S35 Compound potassium bromide (KBr).

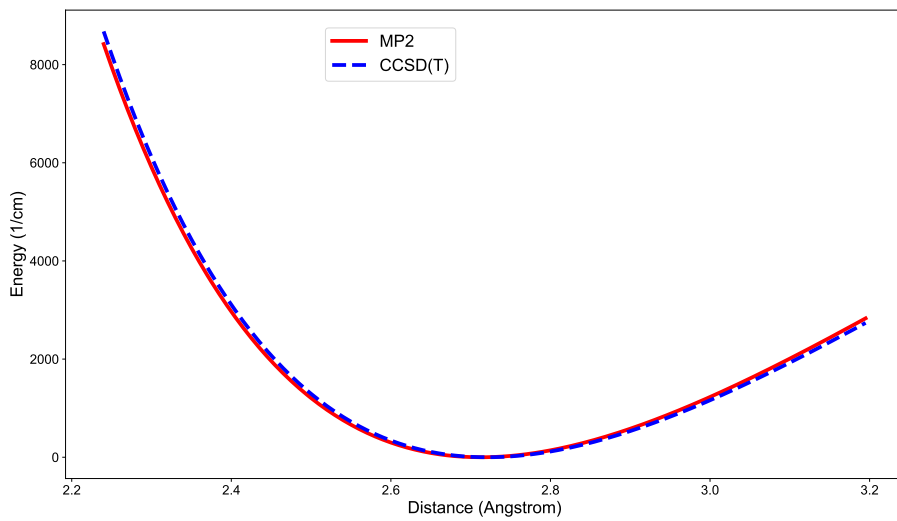

Fig. S36 Compound potassium chloride (KCl).

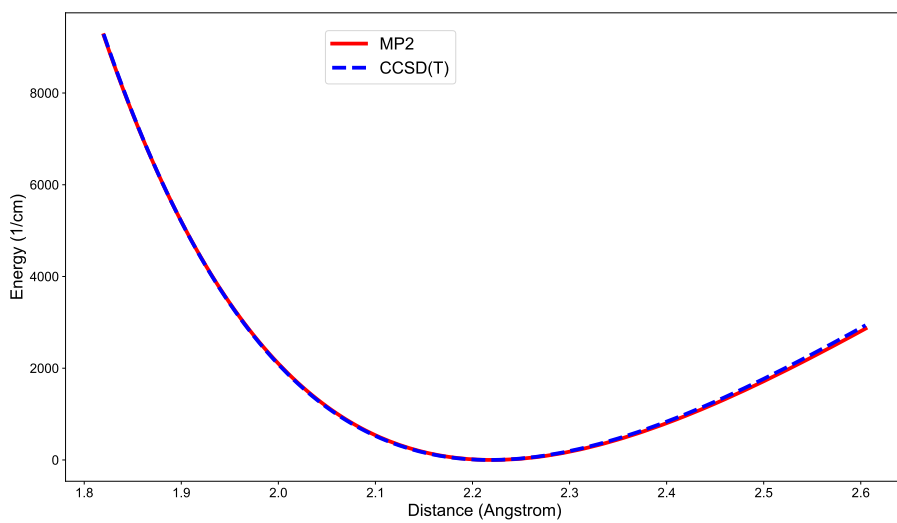

Fig. S37 Compound potassium fluoride (KF).

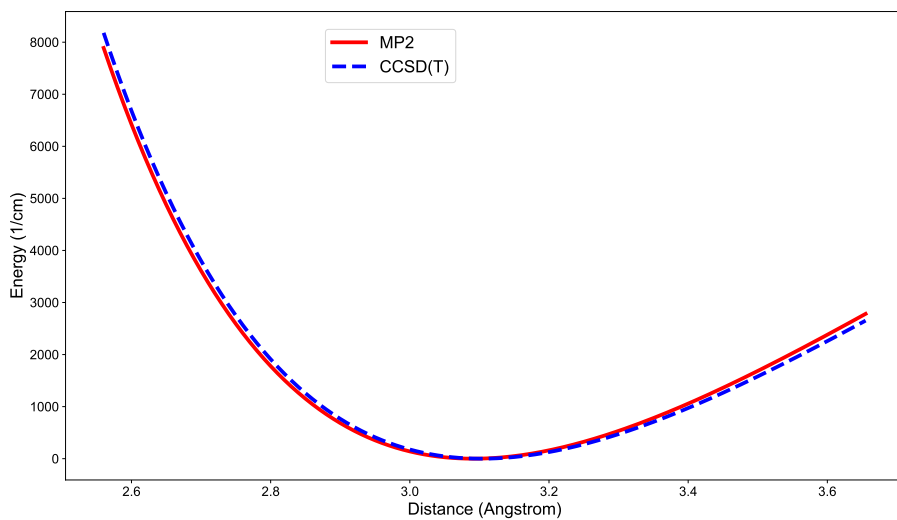

Fig. S38 Compound potassium iodide (KI).

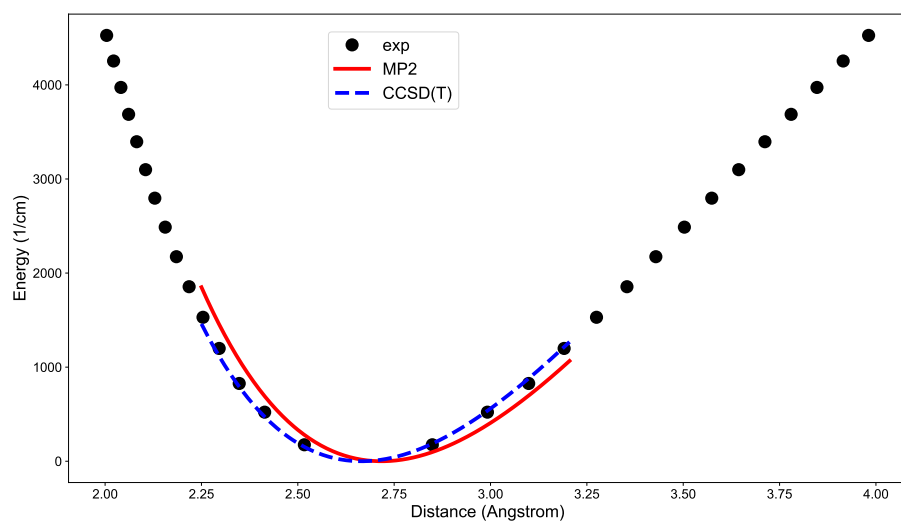

Fig. S39 Compound dilithium ( $\text{Li}_2$ ). Experimental data from ref. 33.

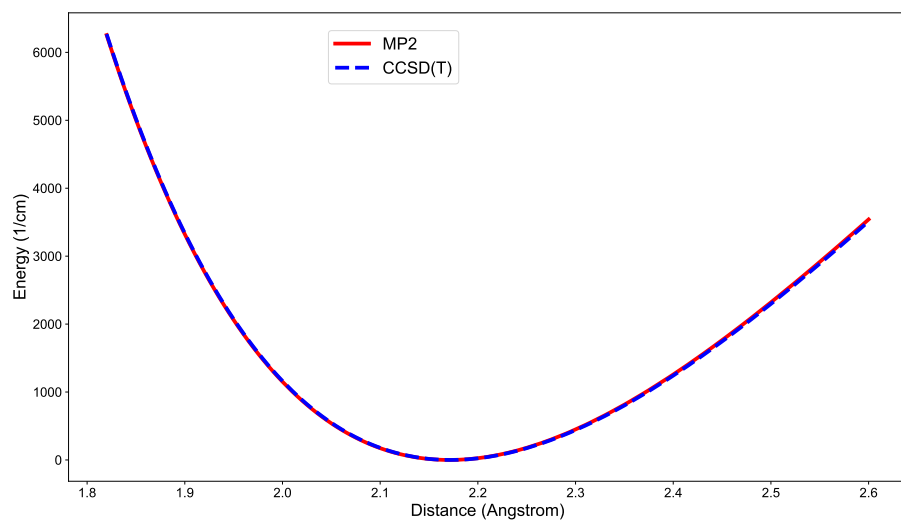

Fig. S40 Compound lithium bromide ( $\text{LiBr}$ ).

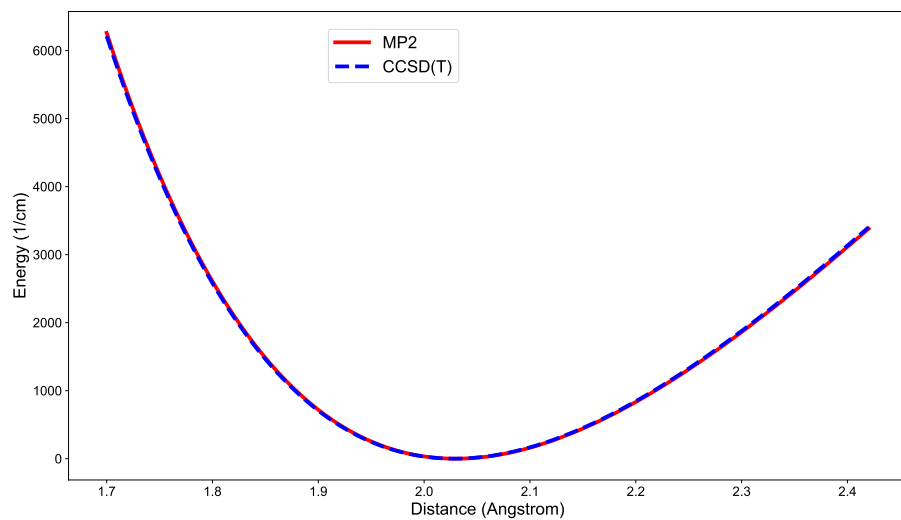

Fig. S41 Compound lithium chloride ( $\text{LiCl}$ ).

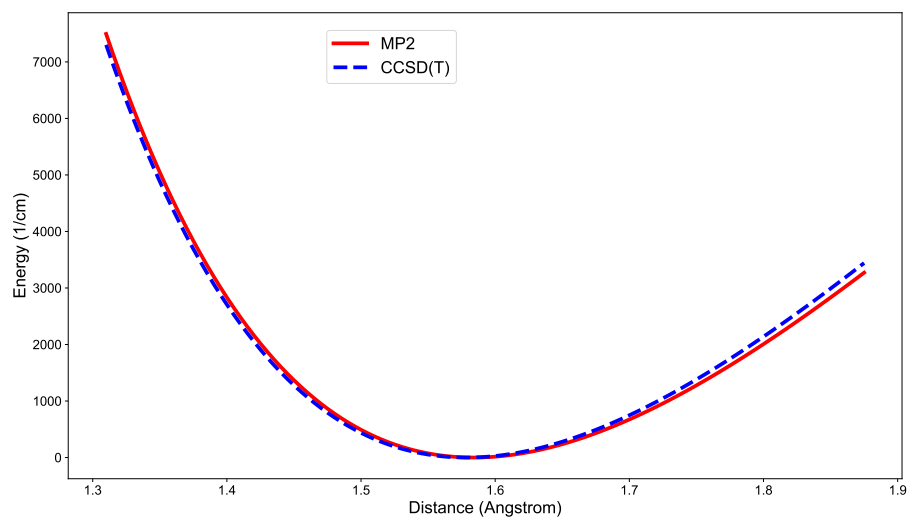

Fig. S42 Compound lithium fluoride (LiF).

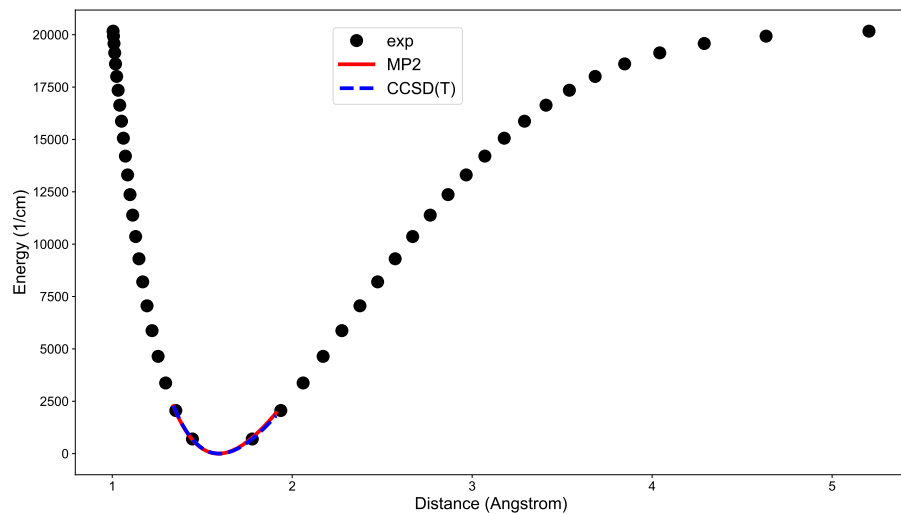

Fig. S43 Compound lithium hydride (LiH). Experimental data from ref. 34.

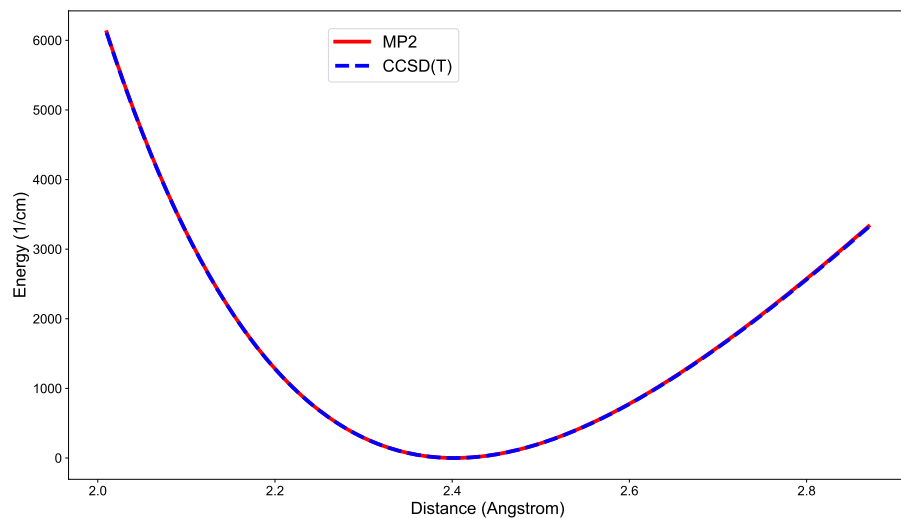

Fig. S44 Compound lithium iodide (LiI).

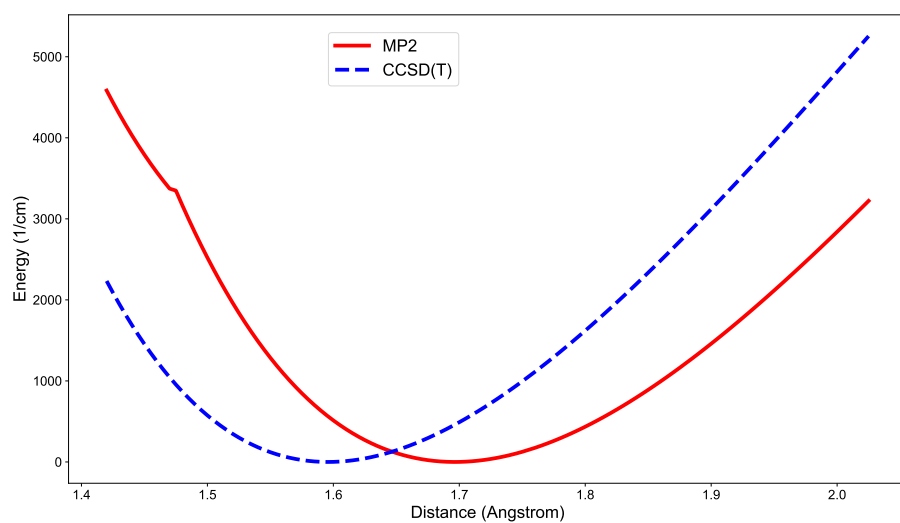

Fig. S45 Compound lithium monoxide (LiO).

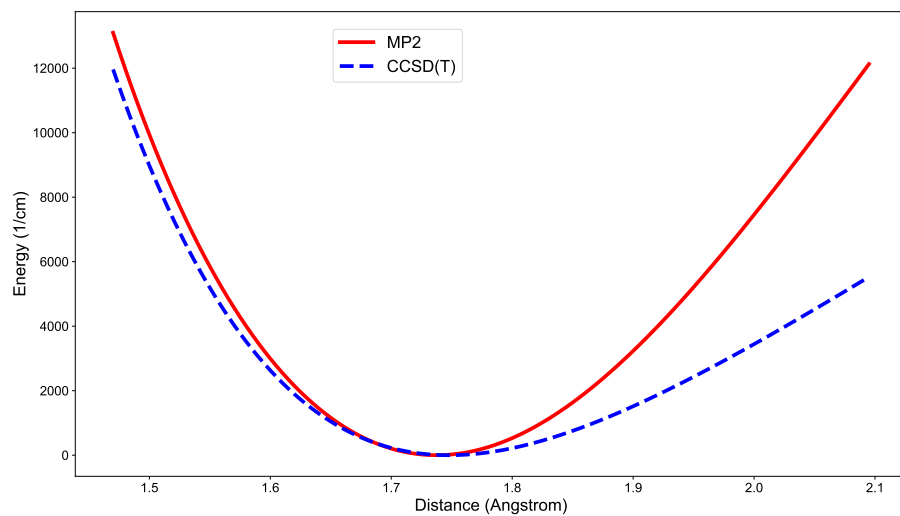

Fig. S46 Compound magnesium oxide (MgO).

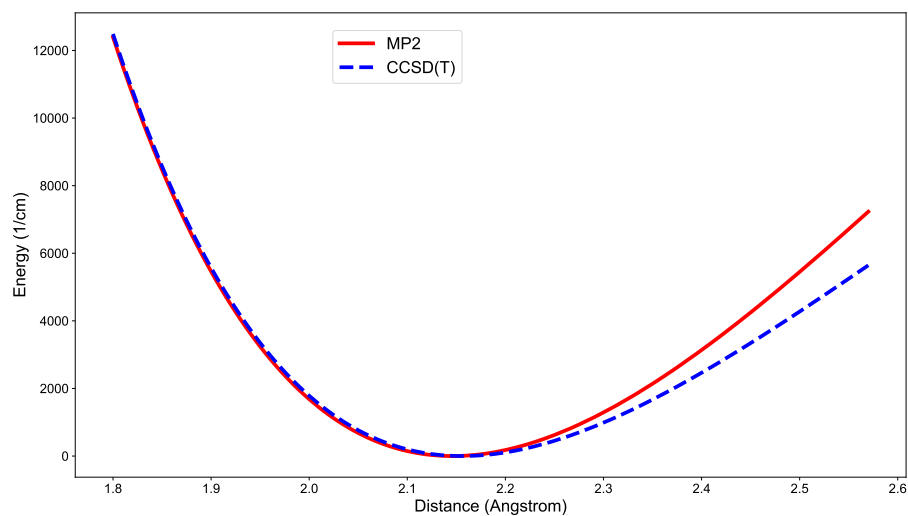

Fig. S47 Compound magnesium sulfide (MgS).

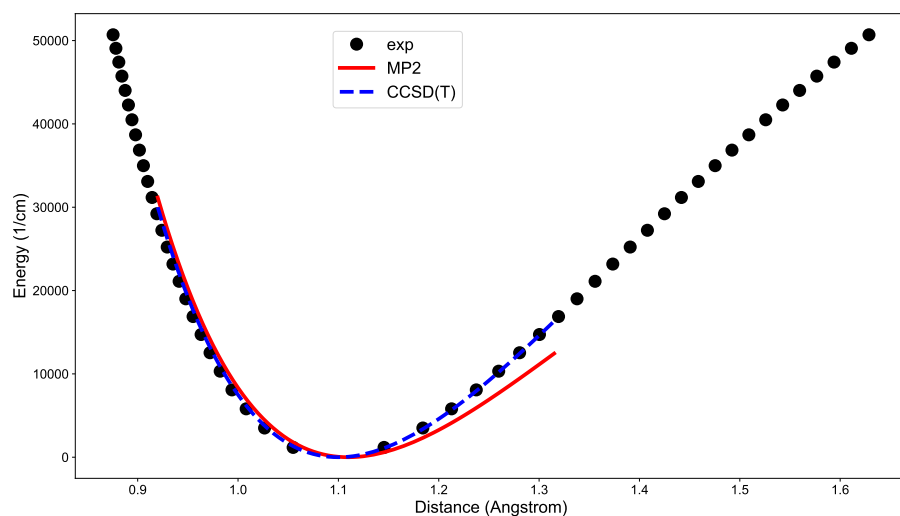

Fig. S48 Compound nitrogen (N<sub>2</sub>). Experimental data from ref. 35.

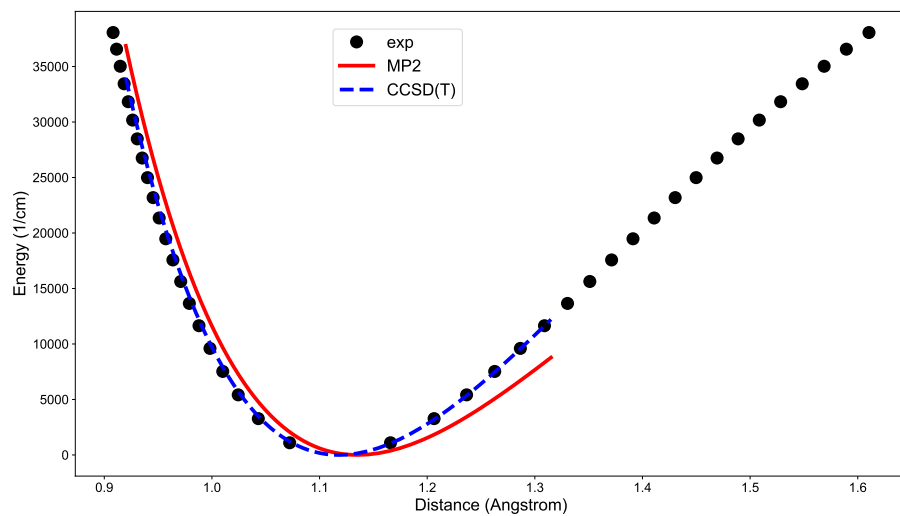

Fig. S49 Compound nitrogen ion (N<sub>2</sub><sup>+</sup>). Experimental data from ref. 29.

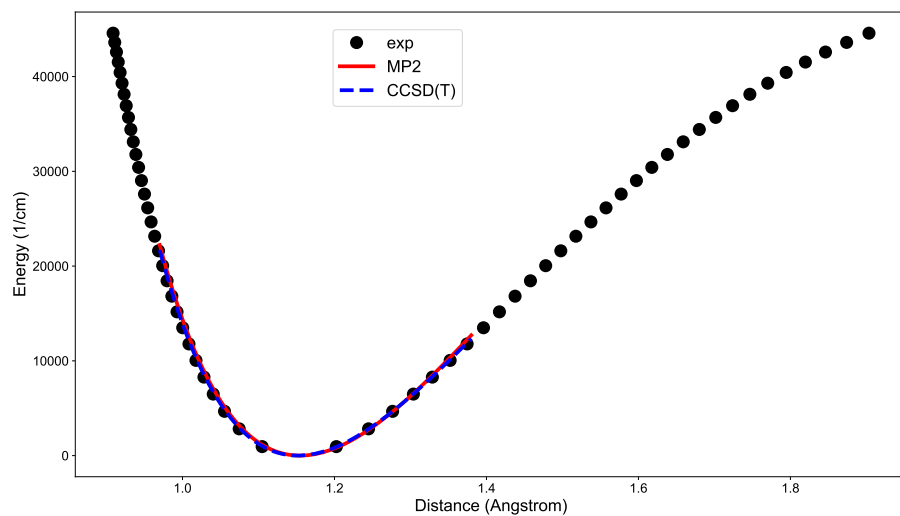

Fig. S50 Compound nitric oxide (NO). Experimental data from ref. 29.



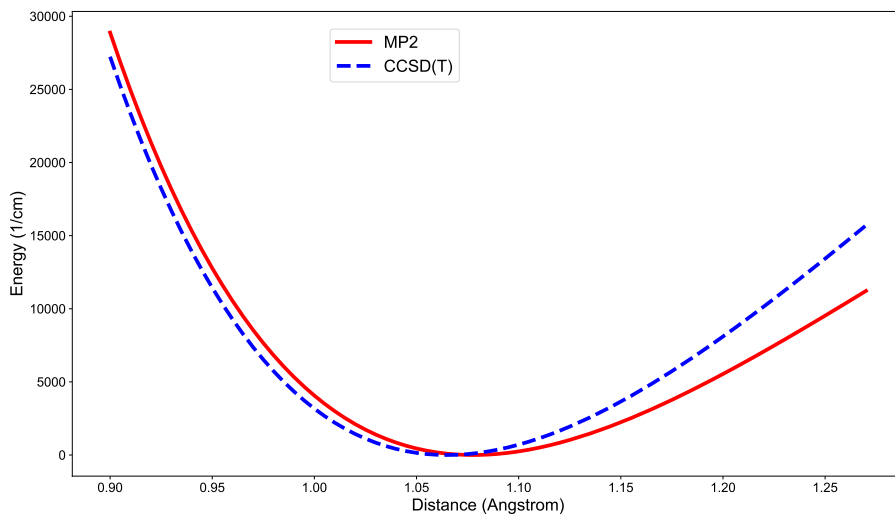

Fig. S51 Compound nitric oxide ion (NO<sup>+</sup>).

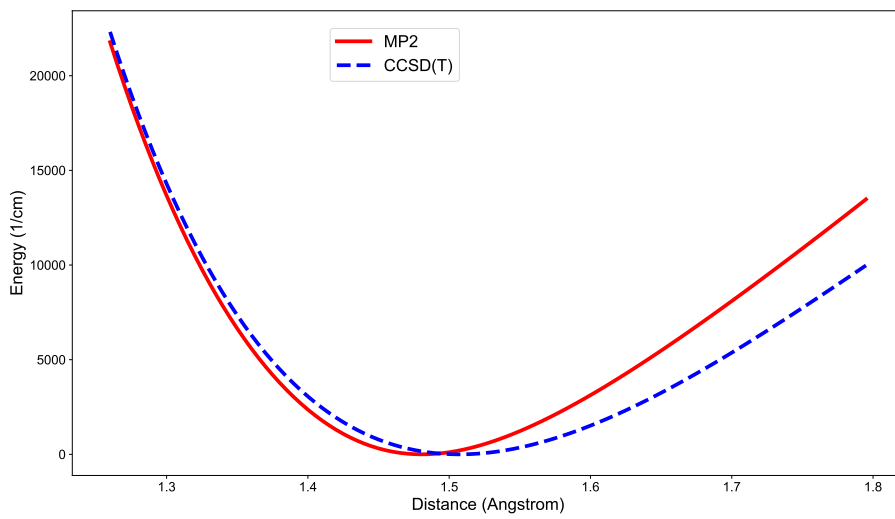

Fig. S52 Compound nitric sulfide (NS).

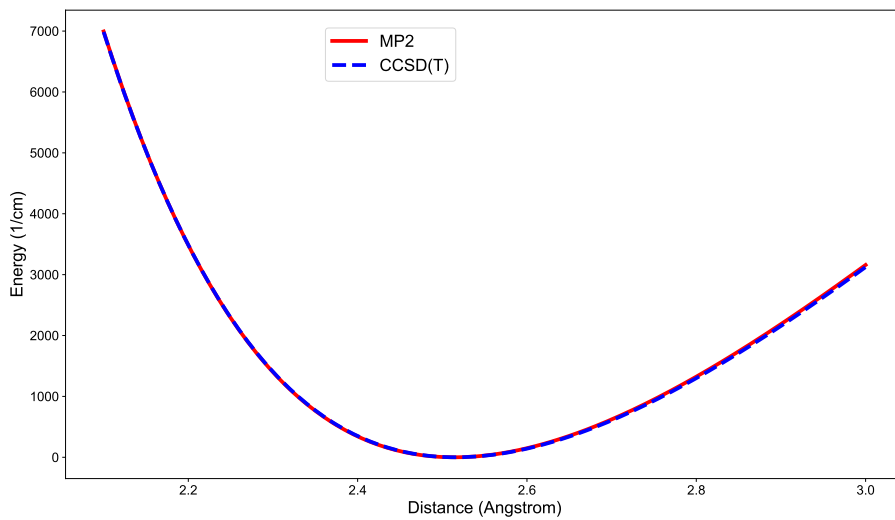

Fig. S53 Compound sodium bromide (NaBr).

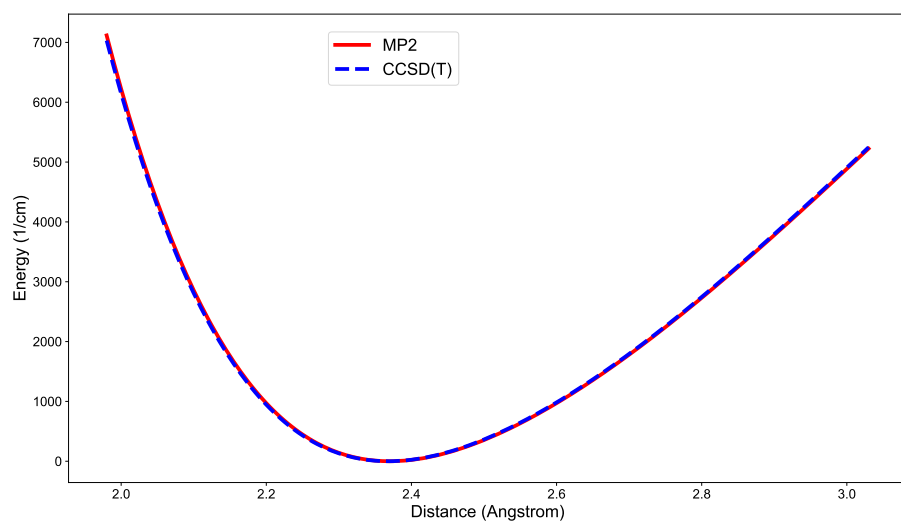

Fig. S54 Compound sodium chloride (NaCl).

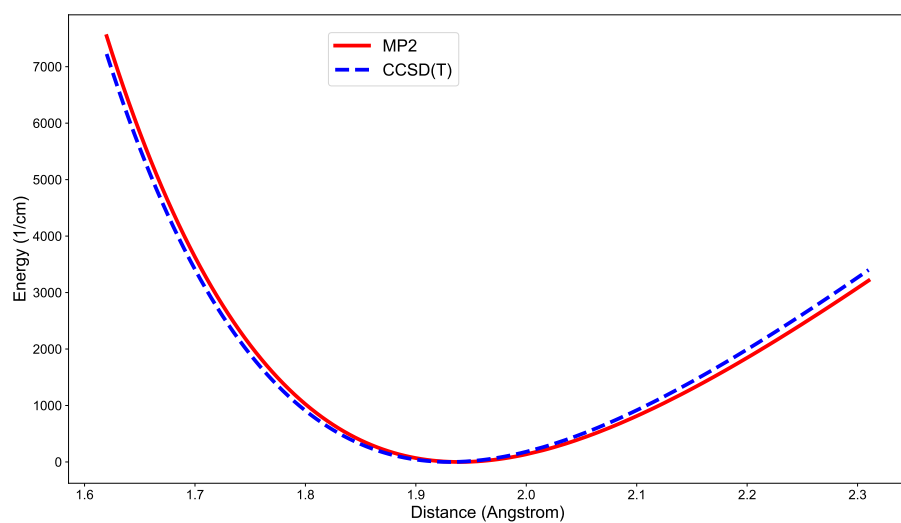

Fig. S55 Compound sodium fluoride (NaF).

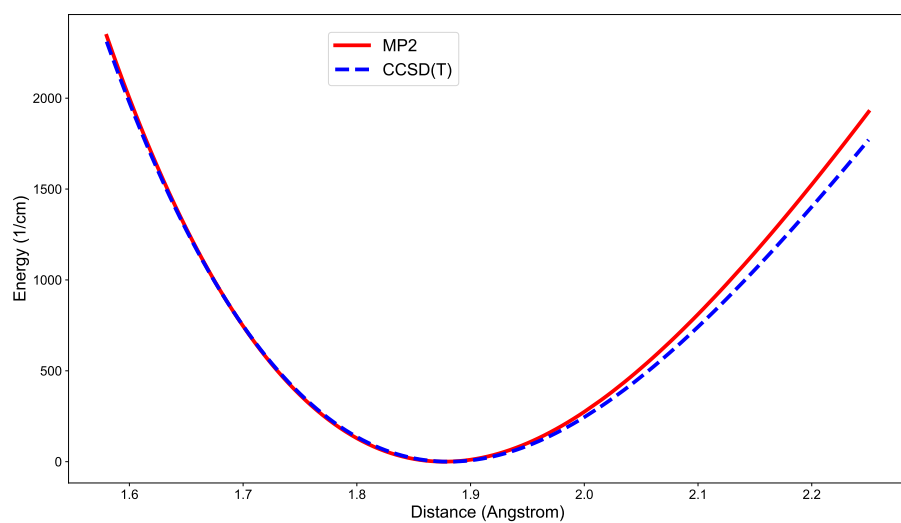

Fig. S56 Compound sodium hydride (NaH).

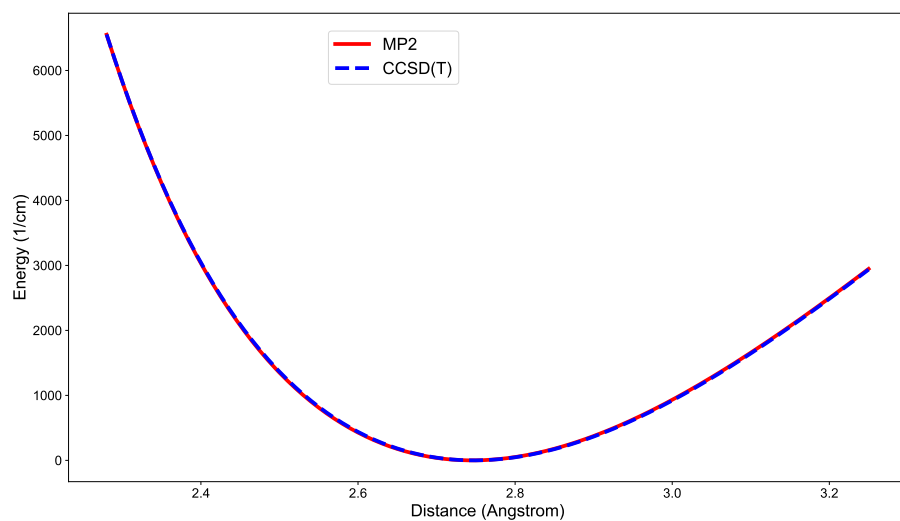

Fig. S57 Compound sodium iodide (NaI).

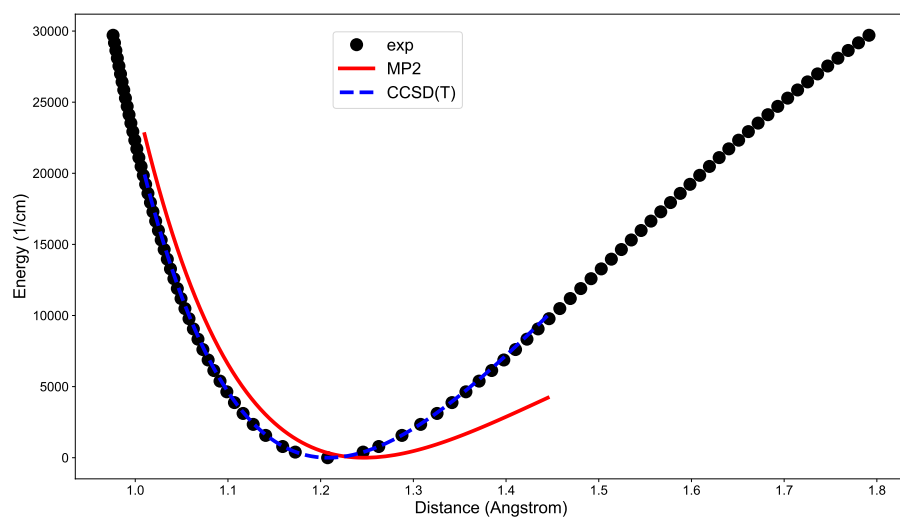

Fig. S58 Compound oxygen ( $\text{O}_2$ ). Experimental data from ref. 36.

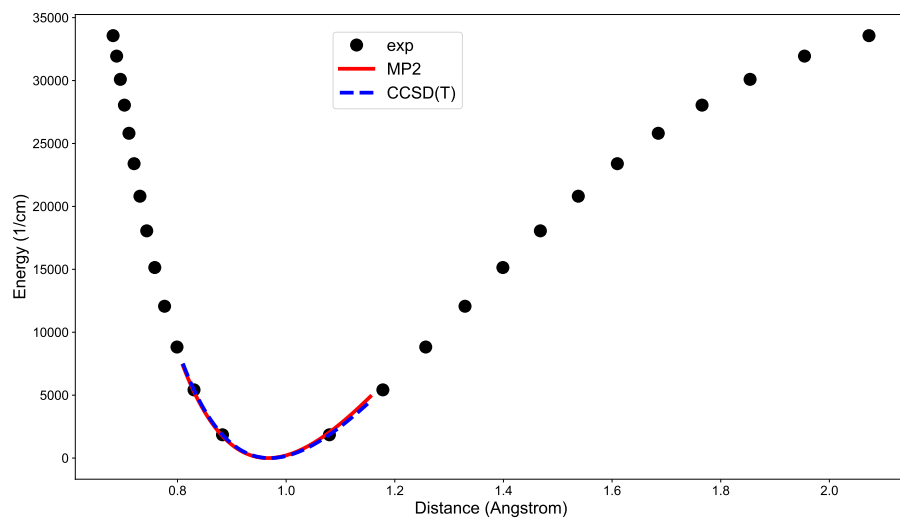

Fig. S59 Compound hydroxide ( $\text{OH}$ ). Experimental data from ref. 29.

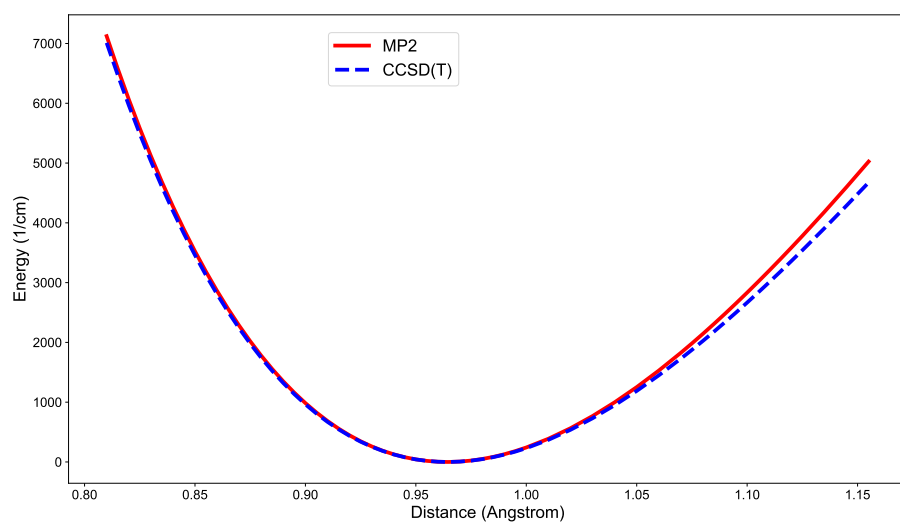

Fig. S60 Compound hydroxide (OH<sup>-</sup>).

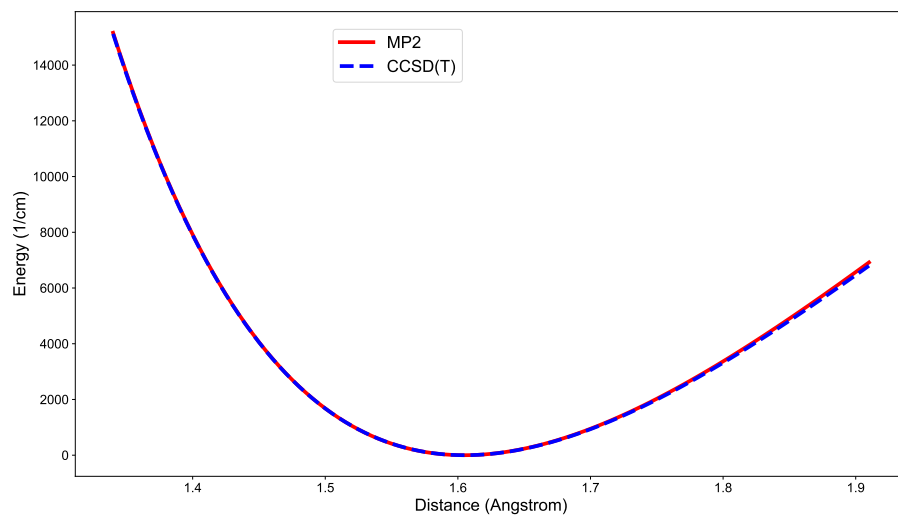

Fig. S61 Compound phosphorus monofluoride (PF).

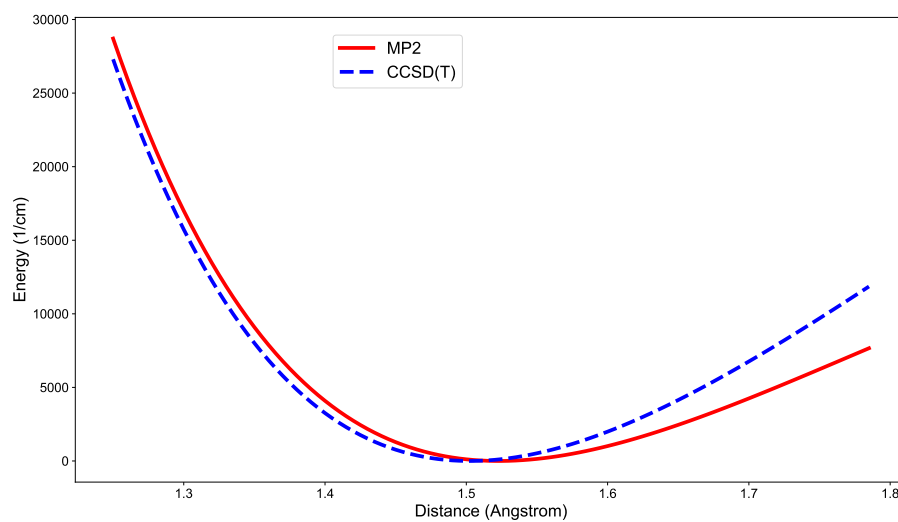

Fig. S62 Compound phosphorus nitride (PN).

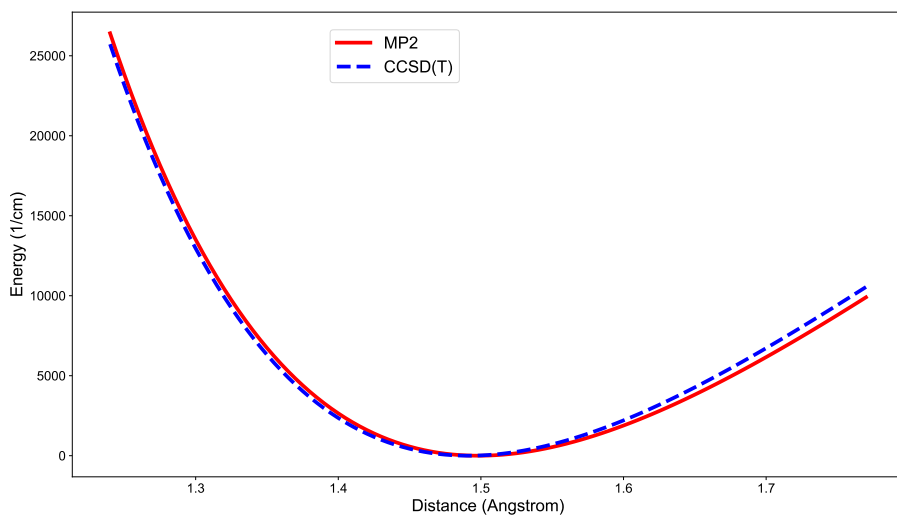

Fig. S63 Compound phosphorus monoxide (PO).

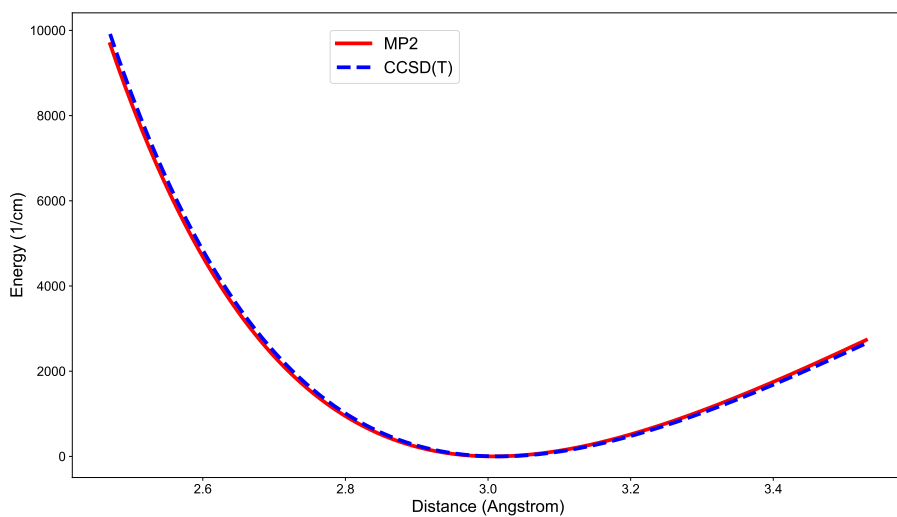

Fig. S64 Compound rubidium bromide (RbBr).

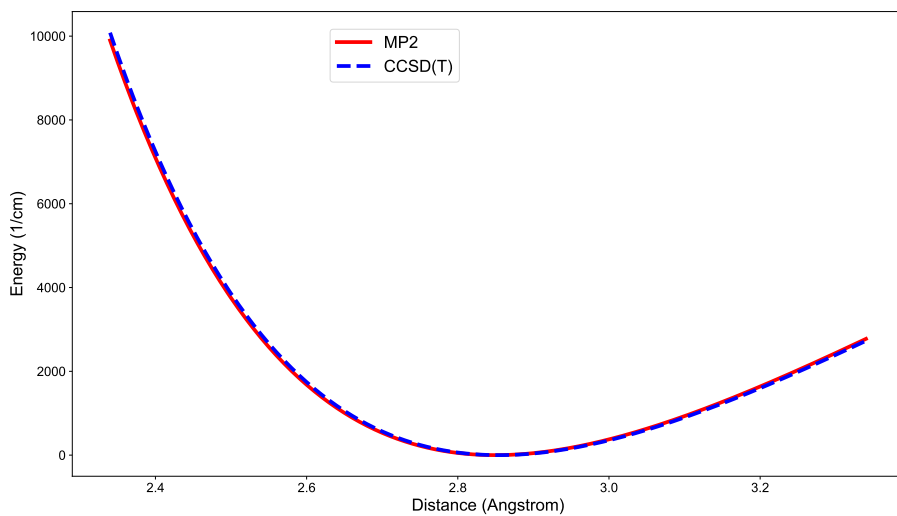

Fig. S65 Compound rubidium chloride (RbCl).

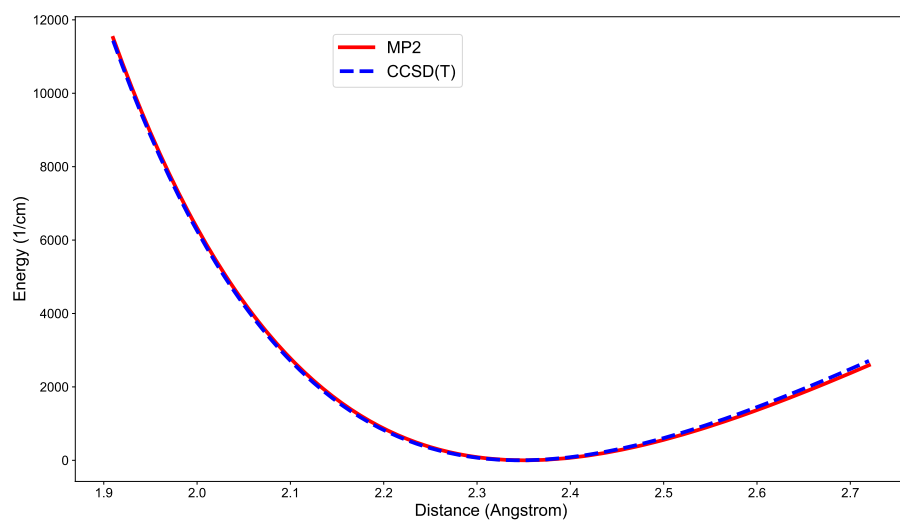

Fig. S66 Compound rubidium fluoride (RbF).

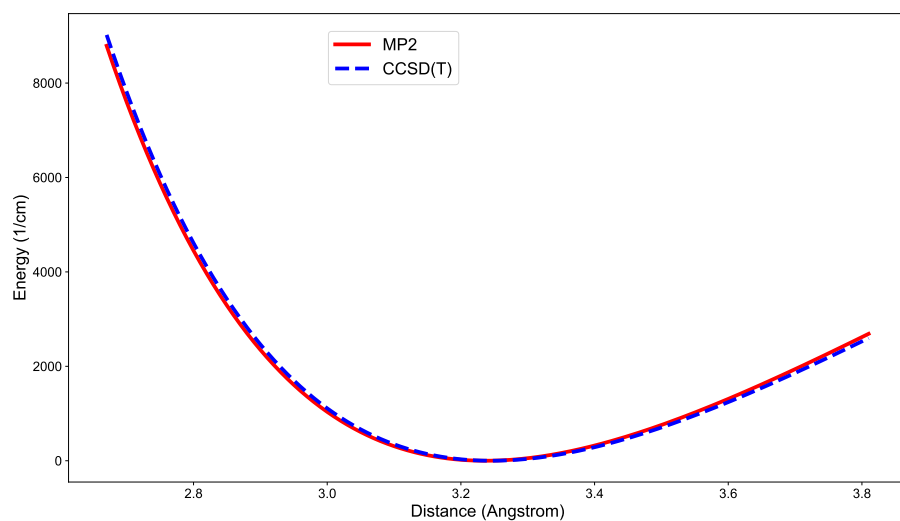

Fig. S67 Compound rubidium iodide (RbI).

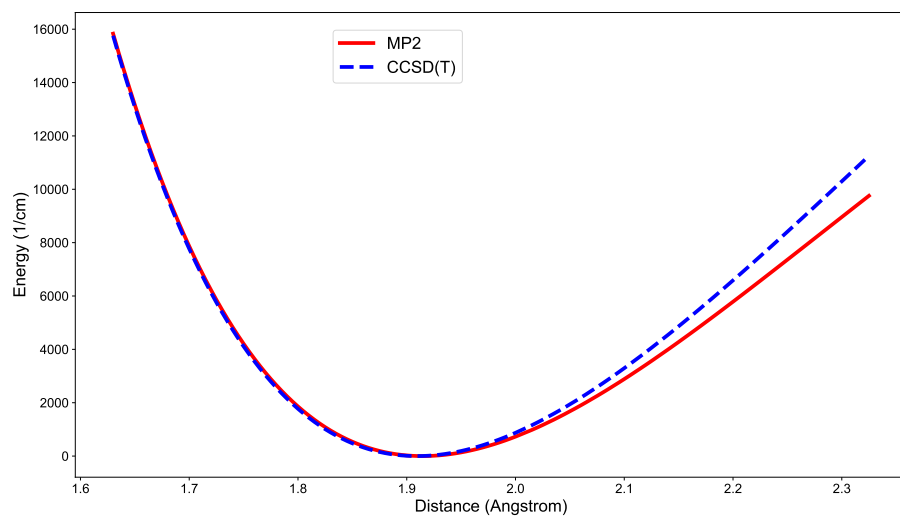

Fig. S68 Compound disulfur (S<sub>2</sub>).

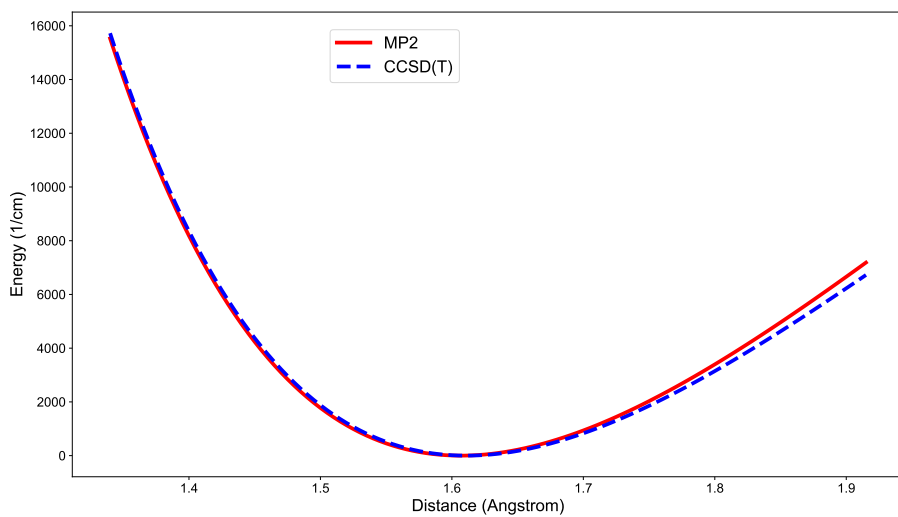

Fig. S69 Compound sulfur monofluoride (SF).

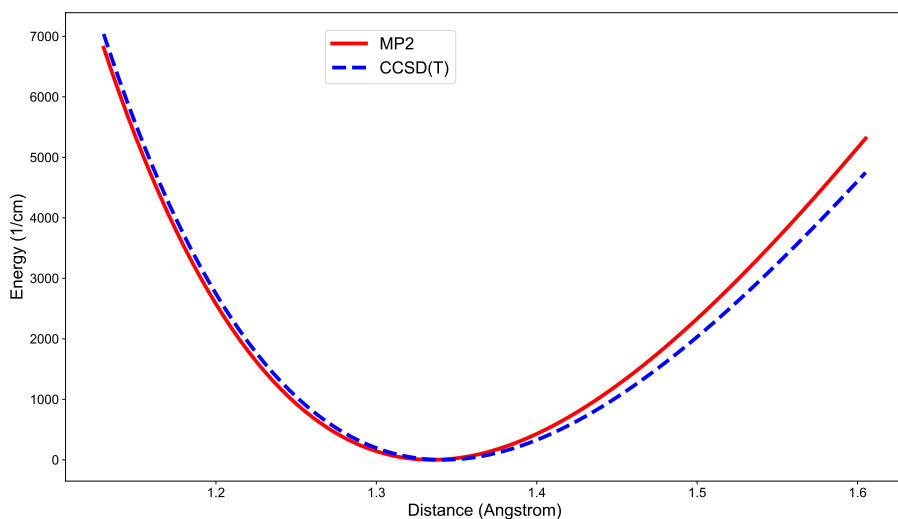

Fig. S70 Compound sulfur hydride (SH).

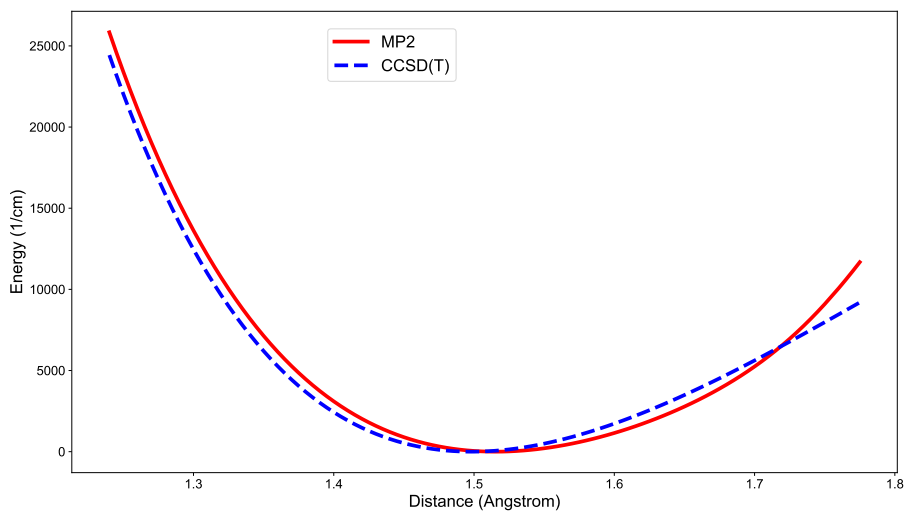

Fig. S71 Compound sulfur monoxide (SO).



## Notes and references

- 1 K. P. Huber and G. Herzberg, *Molecular Spectra and Molecular Structure*, Springer-Verlag, Berlin, Germany, 1979.
- 2 W. Sun, *Mol. Phys.*, 1997, **92**, 105–108.
- 3 H. Hulburt and J. Hirschfelder, *J. Chem. Phys.*, 1941, **9**, 61–69.
- 4 F. M. Rafi, *Phys. Lett. A*, 1995a, **205**, 383–387.
- 5 T. Tietz, *Can. J. Phys.*, 1971, **49**, 1315–&.
- 6 W. Hua, *Phys. Rev. A*, 1990, **42**, 2524–2529.
- 7 I. Levine, *J. Chem. Phys.*, 1966, **45**, 827–828.
- 8 A. Frost and B. Musulin, *J. Chem. Phys.*, 1954, **22**, 1017–1020.
- 9 G. Poeschl and E. Teller, *Z. Phys.*, 1933, **83**, 143–151.
- 10 K. Cahill and V. A. Parsegian, *J. Chem. Phys.*, 2004, **121**, 10839–10842.
- 11 J. Linnett, *Trans. Faraday Soc.*, 1940, **36**, 1123–1134.
- 12 J. Murrell and K. Sorbie, *J. Chem. Soc. Far. Trans.*, 1974, **70**, 1552–1556.
- 13 P. M. Morse, *Phys. Rev.*, 1929, **34**, 57–64.
- 14 Z. H. Deng and Y. P. Fan, *Shandong Univ. J.*, 1957, **7**, 162.
- 15 D. Gardner and L. von Szentpály, *J. Phys. Chem. A.*, 1999, **103**, 9313–9322.
- 16 N. Rosen and P. Morse, *Phys. Rev.*, 1932, **42**, 210–217.
- 17 R. Rydberg, *Z. Phys.*, 1932, **73**, 376–385.
- 18 Y. Varshni, *Can. J. Chem.*, 1988, **66**, 763–766.
- 19 M. Sage, *Chem. Phys.*, 1984, **87**, 431–439.
- 20 K. T. Tang and J. P. Toennies, *J. Chem. Phys.*, 2003, **118**, 4976–4983.
- 21 R. A. Buckingham, *Proc. R. Soc. London Ser. A*, 1938, **168**, 264–283.
- 22 L.-P. Wang, J. Chen and T. V. Voorhis, *J. Chem. Theory Comput.*, 2013, **9**, 452–460.
- 23 S. Noorizadeh and G. Pourshams, *J. Mol. Struct.*, 2004, **678**, 207–210.
- 24 A. Kratzer, *Z. Phys.*, 1920, **3**, 289–307.
- 25 E. Lippincott, *J. Chem. Phys.*, 1953, **21**, 2070–2071.
- 26 R.-H. Xie and J. Gong, *Phys. Rev. Lett.*, 2005, **95**, 263202.
- 27 J. E. Jones, *Proc. Royal Soc. Lond. Ser. A*, 1924, **106**, 463–477.
- 28 J. M. Turney, A. C. Simmonett, R. M. Parrish, E. G. Hohenstein, F. A. Evangelista, J. T. Fermann, B. J. Mintz, L. A. Burns, J. J. Wilke, M. L. Abrams, N. J. Russ, M. L. Leininger, C. L. Janssen, E. T. Seidl, W. D. Allen, H. F. Schaefer, R. A. King, E. F. Valeev, C. D. Sherrill and T. D. Crawford, *Wiley Interdiscip. Rev. Comput. Mol. Sci.*, 2011, **2**, 556–565.
- 29 J. Luque, 2024, Personal communication.
- 30 A. Mantz, J. K. Watson, K. Rao, D. Albritton, A. Schmeltekopf and R. Zare, *J. Mol. Spectrosc.*, 1971, **39**, 180–184.
- 31 S. Weissman, J. T. Vanderslice and R. Battino, *J. Chem. Phys.*, 1963, **39**, 2226–2228.
- 32 J. A. Coxon and P. G. Hajigeorgiou, *J. Mol. Spectrosc.*, 1990, **142**, 254–278.
- 33 P. H. Krupenie, E. A. Mason and J. T. Vanderslice, *J. Chem. Phys.*, 1963, **39**, 2399–2408.
- 34 W. C. Stwalley and W. T. Zemke, *J. Phys. Chem. Ref. Data*, 1993, **22**, 87–112.
- 35 S. Edwards, J. Roncin, F. Launay and F. Rostas, *J. Mol. Spectrosc.*, 1993, **162**, 257–267.
- 36 P. H. Krupenie, *J. Phys. Chem. Ref. Data*, 1972, **1**, 423–534.
